# Supplementary material for: Developmental exposure to the DE-71 mixture of polybrominated diphenyl ether (PBDE) flame retardants induce a complex pattern of endocrine disrupting effects in rats
Source: PeerJ. 2022 Jan 4;10:e12738. doi: 10.7717/peerj.12738 (PMC8740517; doi:10.7717/peerj.12738)
Supplement: Supplemental Information 1 — Data for each treatment group. [file peerj-10-12738-s001.xlsx]

## Sheet: Litter data
Litter	Group	Block	Dose	GD-born	GD7	Gain7-21	dam-birthweight	Damgain	Dam-W14	Damgain1PD1-14	DamWPD27	Gain PD1-27	Impl	Imp-small	pploss	%pploss	peri-loss	%peri	Male-born	Females-Born	Pups-Born	Males-bornA	females bornA	Pups-bornA	Males-bornD	females-bornDFD	Pups -bornD	%-bornD	males-D	Females-D	Pups-D	%males	%peni-D
1	1	1	0	22	234.6	72.6	254	19.4	289	35	253	-36	9	.	1	11.1111	1	11.1111	3	5	8	3	5	8	.	.	0	0	.	.	0	37.5	0
2	1	1	0	23	242.4	81.5	243	0.6	283	40	260	-23	12	.	0	0	1	8.33333	5	7	12	5	6	11	.	1	1	8.33333	.	.	0	41.6667	8.33333
3	1	1	0	23	226.9	81.8	239	12.1	273	34	250	-23	11	.	0	0	1	9.09091	4	7	11	4	7	11	.	.	0	0	.	1	1	36.3636	9.09091
4	1	1	0	23	226.2	76	225	-1.2	274	49	229	-45	13	.	0	0	0	0	9	4	13	9	4	13	.	.	0	0	.	.	0	69.2308	0
5	1	1	0	23	237.1	91.6	234	-3.1	284	50	264	-20	15	.	0	0	1	6.66667	7	8	15	7	7	14	.	1	1	6.66667	.	.	0	46.6667	6.66667
6	1	1	0	23.5	241.8	90.4	256	14.2	309	53	275	-34	14	.	1	7.14286	2	14.2857	9	4	13	8	4	12	1	.	1	7.69231	.	.	0	69.2308	7.69231
7	1	1	0	23	220.8	69.6	224	3.2	255	31	243	-12	13	.	2	15.3846	2	15.3846	7	4	11	7	4	11	.	.	0	0	.	.	0	63.6364	0
9	1	1	0	23	238.9	78.4	248	9.1	302	54	275	-27	12	.	1	8.33333	1	8.33333	3	8	11	3	8	11	.	.	0	0	.	.	0	27.2727	0
10	1	1	0	23.5	218.9	48.2	245	26.1	256	11	235	-21	3	.	0	0	0	0	1	2	3	1	2	3	.	.	0	0	.	.	0	33.3333	0
11	2	1	40	23	208.3	87.3	221	12.7	273	52	256	-17	11	.	0	0	0	0	9	2	11	9	2	11	.	.	0	0	.	.	0	81.8182	0
12	2	1	40	23	213.3	89	238	24.7	276	38	257	-19	10	.	0	0	0	0	5	5	10	5	5	10	.	.	0	0	.	.	0	50	0
13	2	1	40	22	248.9	82.2	259	10.1	275	16	252	-23	13	.	0	0	0	0	7	6	13	7	6	13	.	.	0	0	.	.	0	53.8462	0
14	2	1	40	23	241.5	106.2	248	6.5	293	45	262	-31	13	.	0	0	0	0	9	4	13	9	4	13	.	.	0	0	.	.	0	69.2308	0
15	2	1	40	23	239.6	80.1	245	5.4	275	30	244	-31	12	.	1	8.33333	2	16.6667	5	6	11	5	5	10	.	1	1	9.09091	.	.	0	45.4545	9.09091
17	2	1	40	23	220.7	87.2	228	7.3	267	39	251	-16	12	.	0	0	0	0	5	7	12	5	7	12	.	.	0	0	.	.	0	41.6667	0
18	2	1	40	23	223.4	69.6	242	18.6	274	32	246	-28	8	.	0	0	0	0	3	5	8	3	5	8	.	.	0	0	.	.	0	37.5	0
19	2	1	40	23	232	68.6	223	-9	263	40	249	-14	13	.	1	7.69231	1	7.69231	6	6	12	6	6	12	.	.	0	0	.	.	0	50	0
20	2	1	40	23	237.6	48.6	261	23.4	268	7	253	-15	4	.	1	25	1	25	1	2	3	1	2	3	.	.	0	0	.	.	0	33.3333	0
21	2	1	40	23	223	84.8	214	-9	266	52	232	-34	14	.	0	0	0	0	5	9	14	5	9	14	.	.	0	0	.	.	0	35.7143	0
22	2	1	40	23	237.1	89	254	16.9	299	45	261	-38	11	.	1	9.09091	1	9.09091	7	3	10	7	3	10	.	.	0	0	.	.	0	70	0
23	3	1	60	23	236.7	99.6	241	4.3	278	37	273	-5	14	.	0	0	0	0	7	7	14	7	7	14	.	.	0	0	.	.	0	50	0
24	3	1	60	23	238.1	87.4	230	-8.1	288	58	263	-25	15	.	2	13.3333	2	13.3333	7	6	13	7	6	13	.	.	0	0	.	.	0	53.8462	0
25	3	1	60	23	234.4	76.2	214	-20.4	293	79	263	-30	15	.	1	6.66667	2	13.3333	8	6	14	8	5	13	.	1	1	7.14286	.	.	0	57.1429	7.14286
26	3	1	60	23	214.6	72.5	225	10.4	267	42	243	-24	11	.	1	9.09091	1	9.09091	4	6	10	4	6	10	.	.	0	0	.	.	0	40	0
28	3	1	60	23.5	223.5	77.4	235	11.5	261	26	248	-13	13	.	2	15.3846	2	15.3846	5	6	11	5	6	11	.	.	0	0	.	.	0	45.4545	0
29	3	1	60	23	238.9	80	223	-15.9	282	59	277	-5	14	.	0	0	0	0	8	6	14	8	6	14	.	.	0	0	.	.	0	57.1429	0
30	3	1	60	23	217.7	80.1	227	9.3	262	35	244	-18	12	.	1	8.33333	1	8.33333	4	7	11	4	7	11	.	.	0	0	.	.	0	36.3636	0
31	3	1	60	23	223.1	48.6	243	19.9	253	10	243	-10	7	.	3	42.8571	3	42.8571	2	2	4	2	2	4	.	.	0	0	.	.	0	50	0
32	3	1	60	23	210.9	76.1	217	6.1	.	.	.	0	11	.	0	0	11	100	6	5	11	6	5	11	.	.	0	0	6	5	11	54.5455	100
33	3	1	60	23	224.4	81.7	223	-1.4	271	48	253	-18	13	.	0	0	0	0	4	9	13	4	9	13	.	.	0	0	.	.	0	30.7692	0
34	3	1	60	23	238.9	76.6	239	0.1	298	59	277	-21	13	.	1	7.69231	1	7.69231	6	6	12	6	6	12	.	.	0	0	.	.	0	50	0
35	1	2	0	23	240.3	100.7	257	16.7	300	43	289	-11	14	.	1	7.14286	1	7.14286	3	10	13	3	10	13	.	.	0	0	.	.	0	23.0769	0
36	1	2	0	23	211.4	94	221	9.6	275	54	254	-21	12	.	0	0	3	25	6	6	12	6	6	12	.	.	0	0	2	1	3	50	25
37	1	2	0	23	241.7	110.5	248	6.3	314	66	277	-37	15	.	0	0	0	0	7	8	15	7	8	15	.	.	0	0	.	.	0	46.6667	0
38	1	2	0	23	225.4	80.8	250	24.6	286	36	275	-11	11	.	3	27.2727	3	27.2727	5	3	8	5	3	8	.	.	0	0	.	.	0	62.5	0
39	1	2	0	23	219.7	79.7	227	7.3	256	29	244	-12	13	.	1	7.69231	1	7.69231	6	6	12	6	6	12	.	.	0	0	.	.	0	50	0
40	1	2	0	23	236.3	75	253	16.7	300	47	276	-24	10	.	1	10	1	10	4	5	9	4	5	9	.	.	0	0	.	.	0	44.4444	0
41	1	2	0	23	209.5	97.1	219	9.5	271	52	244	-27	12	.	0	0	0	0	5	7	12	5	7	12	.	.	0	0	.	.	0	41.6667	0
42	1	2	0	23	232.1	91.4	239	6.9	289	50	297	8	14	.	0	0	1	7.14286	5	9	14	5	9	14	.	.	0	0	.	1	1	35.7143	7.14286
43	1	2	0	23	232.1	93.7	243	10.9	295	52	275	-20	15	.	1	6.66667	2	13.3333	9	5	14	9	4	13	.	1	1	7.14286	.	.	0	64.2857	7.14286
44	1	2	0	23	239.2	89.8	249	9.8	300	51	291	-9	13	.	0	0	1	7.69231	6	7	13	6	6	12	.	1	1	7.69231	.	.	0	46.1538	7.69231
45	1	2	0	23	232.6	72.3	264	31.4	285	21	270	-15	7	.	2	28.5714	2	28.5714	1	4	5	1	4	5	.	.	0	0	.	.	0	20	0
46	1	2	0	23	223.4	98.5	266	42.6	298	32	280	-18	10	.	1	10	1	10	4	5	9	4	5	9	.	.	0	0	.	.	0	44.4444	0
47	2	2	40	23	213.1	85	210	-3.1	259	49	250	-9	13	.	1	7.69231	1	7.69231	4	8	12	4	8	12	.	.	0	0	.	.	0	33.3333	0
49	2	2	40	23	242	94.2	253	11	290	37	277	-13	14	.	3	21.4286	3	21.4286	5	6	11	5	6	11	.	.	0	0	.	.	0	45.4545	0
50	2	2	40	23	237	84.2	248	11	289	41	257	-32	11	.	1	9.09091	1	9.09091	4	6	10	4	6	10	.	.	0	0	.	.	0	40	0
51	2	2	40	23	222.6	63	246	23.4	283	37	249	-34	7	.	1	14.2857	1	14.2857	2	4	6	2	4	6	.	.	0	0	.	.	0	33.3333	0
52	2	2	40	23	245.8	104.9	257	11.2	300	43	291	-9	15	.	0	0	1	6.66667	3	12	15	3	12	15	.	.	0	0	.	1	1	20	6.66667
53	2	2	40	23	234.9	78.8	233	-1.9	273	40	261	-12	13	.	1	7.69231	1	7.69231	6	6	12	6	6	12	.	.	0	0	.	.	0	50	0
54	2	2	40	23	233.2	77.9	274	40.8	296	22	267	-29	6	.	1	16.6667	1	16.6667	1	4	5	1	4	5	.	.	0	0	.	.	0	20	0
55	2	2	40	23	218.5	105.1	246	27.5	286	40	272	-14	13	.	0	0	0	0	7	6	13	7	6	13	.	.	0	0	.	.	0	53.8462	0
56	2	2	40	23	220.4	91.1	228	7.6	263	35	251	-12	13	.	0	0	0	0	6	7	13	6	7	13	.	.	0	0	.	.	0	46.1538	0
57	3	2	60	23	237.3	69.5	240	2.7	276	36	262	-14	8	.	0	0	0	0	2	6	8	2	6	8	.	.	0	0	.	.	0	25	0
58	3	2	60	.	224.3	98.6	.	.	.	.	.	.	16	.	16	100	16	100	.	.	.	.	.	.	.	.	16	100	.	.	0	.	0
59	3	2	60	23	236.1	85.7	246	9.9	280	34	263	-17	11	.	0	0	0	0	5	6	11	5	6	11	.	.	0	0	.	.	0	45.4545	0
60	3	2	60	23	233.5	98	237	3.5	288	51	269	-19	14	.	0	0	1	7.14286	8	6	14	8	6	14	.	.	0	0	1	.	1	57.1429	7.14286
61	3	2	60	23	212.7	45.9	228	15.3	247	19	234	-13	7	.	3	42.8571	3	42.8571	2	2	4	2	2	4	.	.	0	0		.	0	50	0
62	3	2	60	23	220.3	88.8	208	-12.3	247	39	263	16	14	.	0	0	10	71.4286	8	6	14	7	6	13	1	.	1	7.14286	6	3	9	57.1429	71.4286
63	3	2	60	23	247.8	40.1	267	19.2	271	4	260	-11	2	.	0	0	0	0	0	2	2	0	2	2	.	.	0	0	.		0	0	0
64	3	2	60	23	236.4	90.6	239	2.6	284	45	276	-8	13	.	0	0	0	0	7	6	13	7	6	13	.	.	0	0	.	.	0	53.8462	0
65	3	2	60	23	238.2	96.5	233	-5.2	272	39	278	6	14	.	0	0	2	14.2857	7	7	14	7	5	12	.	2	2	14.2857	.	.	0	50	14.2857
66	3	2	60	23	221.9	79.8	226	4.1	264	38	253	-11	13	.	0	0	0	0	6	7	13	6	7	13	.	.	0	0	.	.	0	46.1538	0

## Sheet: Pup data
Litter	Group	Block	Dose	GD	no.	pup no.	sex, 1=M, 2=F	W-birth-M	AGD M	AGDmm	AGI M	W-B-female	AGD female	Weight	AGD	AGDmm	AGI F	w6-M	w6-F	w6-all	w14M	W14-F	W14-all	W27-M	W27-F	W27-all
M 1	1	1	0	22	8	1	2	.	.	.	.	6.2	13	6.2	13	2.093	1.1393	.	16.7	16.7	.	35.4	35.4	.	78	78
M 1	1	1	0	22	8	2	2	.	.	.	.	6.3	13	6.3	13	2.093	1.13324	.	16.3	16.3	.	35.6	35.6	.	86	86
M 1	1	1	0	22	8	3	2	.	.	.	.	6.6	13	6.6	13	2.093	1.1158	.	17	17	.	37.7	37.7	.	82	82
M 1	1	1	0	22	8	4	2	.	.	.	.	6.1	13	6.1	13	2.093	1.14549	.	17.5	17.5	.	37.4	37.4	.	81	81
M 1	1	1	0	22	8	5	2	.	.	.	.	6.1	13	6.1	13	2.093	1.14549	.	17.2	17.2	.	36.7	36.7	.	.	.
M 1	1	1	0	22	8	6	1	5.4	24	3.864	2.20245	.	.	5.4	24	.	.	17.4	.	17.4	36.6	.	36.6	.	.	.
M 1	1	1	0	22	8	7	1	6.4	23	3.703	1.99447	.	.	6.4	23	.	.	14.6	.	14.6	33.2	.	33.2	82	.	82
M 1	1	1	0	22	8	8	1	6.4	26	4.186	2.25462	.	.	6.4	26	.	.	17.1	.	17.1	37.4	.	37.4	78	.	78
.	.	.	.	.	.	.	.	.	.	.	.	.	.	.	.	.	.	.	.	.	.	.	.	.	.	.
M 2	1	1	0	23	11	1	2	.	.	.	.	6.2	13	6.2	13	2.093	1.1393	.	11.7	11.7	.	25.1	25.1	.	62	62
M 2	1	1	0	23	11	2	2	.	.	.	.	5.5	12	5.5	12	1.932	1.09451	.	12	12	.	24.6	24.6	.	63	63
M 2	1	1	0	23	11	3	2	.	.	.	.	6.3	13	6.3	13	2.093	1.13324	.	11.7	11.7	.	25.5	25.5	.	58	58
M 2	1	1	0	23	11	4	2	.	.	.	.	5.7	12	5.7	12	1.932	1.08156	.	12.1	12.1	.	20.8	20.8	.	57	57
M 2	1	1	0	23	11	5	2	.	.	.	.	6.2	12	6.2	12	1.932	1.05166	.	11.9	11.9	.	24.9	24.9	.	59	59
M 2	1	1	0	23	11	6	2	.	.	.	.	5.9	12	5.9	12	1.932	1.06919	.	10.8	10.8	.	23.6	23.6	.	.	.
M 2	1	1	0	23	11	7	1	5.9	24	3.864	2.13839	.	.	5.9	24	.	.	11.2	.	11.2	24.1	.	24.1	.	.	.
M 2	1	1	0	23	11	8	1	6.1	25	4.025	2.20287	.	.	6.1	25	.	.	11.7	.	11.7	24.1	.	24.1	58	.	58
M 2	1	1	0	23	11	9	1	5.9	25	4.025	2.22749	.	.	5.9	25	.	.	12.6	.	12.6	25.2	.	25.2	57	.	57
M 2	1	1	0	23	11	10	1	6.6	23	3.703	1.97411	.	.	6.6	23	.	.	11.8	.	11.8	25.1	.	25.1	65	.	65
M 2	1	1	0	23	11	11	1	6.5	23	3.703	1.98419	.	.	6.5	23	.	.	12.3	.	12.3	22	.	22	61	.	61
.	.	.	.	.	.	.	.	.	.	.	.	.	.	.	.	.	.	.	.	.	.	.	.	.	.	.
M 3	1	1	0	23	11	1	2	.	.	.	.	6.1	13	6.1	13	2.093	1.14549	.	11.6	11.6	.	28	28	.	60	60
M 3	1	1	0	23	11	2	2	.	.	.	.	6.2	11	6.2	11	1.771	0.964024	.	11.5	11.5	.	23.4	23.4	.	55	55
M 3	1	1	0	23	11	3	2	.	.	.	.	5.8	12	5.8	12	1.932	1.0753	.	10.6	10.6	.	25.1	25.1	.	60	60
M 3	1	1	0	23	11	4	2	.	.	.	.	6.1	12	6.1	12	1.932	1.05738	.	12.3	12.3	.	27.7	27.7	.	60	60
M 3	1	1	0	23	11	5	2	.	.	.	.	4.5	11	4.5	11	1.771	1.07271	.	12.2	12.2	.	26.7	26.7	.	62	62
M 3	1	1	0	23	11	6	2	.	.	.	.	5.5	12	5.5	12	1.932	1.09451	.	11.8	11.8	.	27.1	27.1	.	.	.
M 3	1	1	0	23	11	7	2	.	.	.	.	5.7	12	5.7	12	1.932	1.08156	.	10.4	10.4	.	mangler	mangler	.	.	.
M 3	1	1	0	23	11	8	1	6.5	24	3.864	2.07046	.	.	6.5	24	.	.	12.1	.	12.1	28.6	.	28.6	.	.	.
M 3	1	1	0	23	11	9	1	6.7	23	3.703	1.96424	.	.	6.7	23	.	.	12.2	.	12.2	28	.	28	65	.	65
M 3	1	1	0	23	11	10	1	6.2	22	3.542	1.92805	.	.	6.2	22	.	.	11.8	.	11.8	27.6	.	27.6	64	.	64
M 3	1	1	0	23	11	11	1	6.2	22	3.542	1.92805	.	.	6.2	22	.	.	13	.	13	26.8	.	26.8	66	.	66
.	.	.	.	.	.	.	.	.	.	.	.	.	.	.	.	.	.	.	.	.	.	.	.	.	.	.
M 4	1	1	0	23	13	1	2	.	.	.	.	5.8	13	5.8	13	2.093	1.16491	.	11	11	.	25.1	25.1	.	61	61
M 4	1	1	0	23	13	2	2	.	.	.	.	5.8	13	5.8	13	2.093	1.16491	.	11.7	11.7	.	25.1	25.1	.	59	59
M 4	1	1	0	23	13	3	2	.	.	.	.	6.3	13	6.3	13	2.093	1.13324	.	11.9	11.9	.	25.2	25.2	.	60	60
M 4	1	1	0	23	13	4	2	.	.	.	.	4.8	13	4.8	13	2.093	1.24076	.	10.2	10.2	.	24.6	24.6	.	.	.
M 4	1	1	0	23	13	5	1	6.4	26	4.186	2.25462	.	.	6.4	26	.	.	12.1	.	12.1	25	.	25	.	.	.
M 4	1	1	0	23	13	6	1	6.1	25	4.025	2.20287	.	.	6.1	25	.	.	11.3	.	11.3	24	.	24	59	.	59
M 4	1	1	0	23	13	7	1	6.7	24	3.864	2.04965	.	.	6.7	24	.	.	11.7	.	11.7	26	.	26	62	.	62
M 4	1	1	0	23	13	8	1	6.5	26	4.186	2.24299	.	.	6.5	26	.	.	11.4	.	11.4	25.6	.	25.6	59	.	59
M 4	1	1	0	23	13	9	1	6.3	25	4.025	2.17931	.	.	6.3	25	.	.	11.6	.	11.6	25.4	.	25.4	59	.	59
M 4	1	1	0	23	13	10	1	6.2	26	4.186	2.2786	.	.	6.2	26	.	.	11.1	.	11.1	25.4	.	25.4	57	.	57
M 4	1	1	0	23	13	11	1	6.2	25	4.025	2.19096	.	.	6.2	25	.	.	12	.	12	25	.	25	62	.	62
M 4	1	1	0	23	13	12	1	6	26	4.186	2.30364	.	.	6	26	.	.	10.7	.	10.7	24.9	.	24.9	58	.	58
M 4	1	1	0	23	13	13	1	7	26	4.186	2.18826	.	.	7	26	.	.	11.7	.	11.7	27.4	.	27.4	62	.	62
.	.	.	.	.	.	.	.	.	.	.	.	.	.	.	.	.	.	.	.	.	.	.	.	.	.	.
M 5	1	1	0	23	14	1	2	.	.	.	.	5.8	13	5.8	13	2.093	1.16491	.	10.1	10.1	.	22	22	.	59	59
M 5	1	1	0	23	14	2	2	.	.	.	.	6	14	6	14	2.254	1.24042	.	11.3	11.3	.	23	23	.	61	61
M 5	1	1	0	23	14	3	2	.	.	.	.	5.4	14	5.4	14	2.254	1.28476	.	10.7	10.7	.	23.2	23.2	.	58	58
M 5	1	1	0	23	14	4	2	.	.	.	.	5.8	13	5.8	13	2.093	1.16491	.	11.3	11.3	.	24.7	24.7	.	59	59
M 5	1	1	0	23	14	5	2	.	.	.	.	5.5	14	5.5	14	2.254	1.27693	.	9.8	9.8	.	23.4	23.4	.	64	64
M 5	1	1	0	23	14	6	2	.	.	.	.	5.8	14	5.8	14	2.254	1.25452	.	10.7	10.7	.	20.7	20.7	.	60	60
M 5	1	1	0	23	14	7	2	.	.	.	.	5.6	14	5.6	14	2.254	1.26928	.	11.1	11.1	.	23.1	23.1	.	.	.
M 5	1	1	0	23	14	8	1	6	24	3.864	2.12644	.	.	6	24	.	.	11.4	.	11.4	23.4	.	23.4	.	.	.
M 5	1	1	0	23	14	9	1	5.8	24	3.864	2.15061	.	.	5.8	24	.	.	10.5	.	10.5	21.9	.	21.9	59	.	59
M 5	1	1	0	23	14	10	1	6.2	25	4.025	2.19096	.	.	6.2	25	.	.	11.4	.	11.4	24.3	.	24.3	62	.	62
M 5	1	1	0	23	14	11	1	5.7	24	3.864	2.16311	.	.	5.7	24	.	.	11	.	11	23.7	.	23.7	58	.	58
M 5	1	1	0	23	14	12	1	5.8	24	3.864	2.15061	.	.	5.8	24	.	.	10.1	.	10.1	23.7	.	23.7	61	.	61
M 5	1	1	0	23	14	13	1	5.9	25	4.025	2.22749	.	.	5.9	25	.	.	11	.	11	23.7	.	23.7	58	.	58
M 5	1	1	0	23	14	14	1	6.1	24	3.864	2.11476	.	.	6.1	24	.	.	11.5	.	11.5	25	.	25	60	.	60
.	.	.	.	.	.	.	.	.	.	.	.	.	.	.	.	.	.	.	.	.	.	.	.	.	.	.
M 6	1	1	0	23.5	12	1	2	.	.	.	.	6	13	6	13	2.093	1.15182	.	12.9	12.9	.	27.9	27.9	.	64	64
M 6	1	1	0	23.5	12	2	2	.	.	.	.	6	13	6	13	2.093	1.15182	.	12.5	12.5	.	25.5	25.5	.	67	67
M 6	1	1	0	23.5	12	3	2	.	.	.	.	5.7	14	5.7	14	2.254	1.26181	.	11.6	11.6	.	26.5	26.5	.	67	67
M 6	1	1	0	23.5	12	4	2	.	.	.	.	5.9	13	5.9	13	2.093	1.15829	.	12.4	12.4	.	26.9	26.9	.	.	.
M 6	1	1	0	23.5	12	5	1	6.5	24	3.864	2.07046	.	.	6.5	24	.	.	13	.	13	26.9	.	26.9	.	.	.
M 6	1	1	0	23.5	12	6	1	4.7	22	3.542	2.11454	.	.	4.7	22	.	.	12.3	.	12.3	24.7	.	24.7	64	.	64
M 6	1	1	0	23.5	12	7	1	6	24	3.864	2.12644	.	.	6	24	.	.	10.4	.	10.4	26.9	.	26.9	64	.	64
M 6	1	1	0	23.5	12	8	1	6.2	24	3.864	2.10333	.	.	6.2	24	.	.	11.9	.	11.9	30.4	.	30.4	71	.	71
M 6	1	1	0	23.5	12	9	1	5.5	24	3.864	2.18902	.	.	5.5	24	.	.	11.9	.	11.9	29.2	.	29.2	62	.	62
M 6	1	1	0	23.5	12	10	1	6.4	24	3.864	2.08118	.	.	6.4	24	.	.	13.5	.	13.5	27.4	.	27.4	70	.	70
M 6	1	1	0	23.5	12	11	1	6.5	25	4.025	2.15672	.	.	6.5	25	.	.	13.4	.	13.4	27.4	.	27.4	69	.	69
M 6	1	1	0	23.5	12	12	1	6.2	26	4.186	2.2786	.	.	6.2	26	.	.	12.5	.	12.5	30.2	.	30.2	73	.	73
.	.	.	.	.	.	.	.	.	.	.	.	.	.	.	.	.	.	.	.	.	.	.	.	.	.	.
M 7	1	1	0	23	11	1	2	.	.	.	.	6.2	12	6.2	12	1.932	1.05166	.	11.8	11.8	.	24.9	24.9	.	59	59
M 7	1	1	0	23	11	2	2	.	.	.	.	6.4	13	6.4	13	2.093	1.12731	.	10.9	10.9	.	23.5	23.5	.	62	62
M 7	1	1	0	23	11	3	2	.	.	.	.	5.5	13	5.5	13	2.093	1.18572	.	11.1	11.1	.	22.5	22.5	.	61	61
M 7	1	1	0	23	11	4	2	.	.	.	.	5.8	14	5.8	14	2.254	1.25452	.	11.5	11.5	.	22.9	22.9	.	.	.
M 7	1	1	0	23	11	5	1	6.1	24	3.864	2.11476	.	.	6.1	24	.	.	11.8	.	11.8	25.4	.	25.4	.	.	.
M 7	1	1	0	23	11	6	1	6.4	26	4.186	2.25462	.	.	6.4	26	.	.	11.1	.	11.1	25.7	.	25.7	64	.	64
M 7	1	1	0	23	11	7	1	6	25	4.025	2.21504	.	.	6	25	.	.	11.9	.	11.9	24.6	.	24.6	64	.	64
M 7	1	1	0	23	11	8	1	6.3	24	3.864	2.09214	.	.	6.3	24	.	.	12.2	.	12.2	25.3	.	25.3	64	.	64
M 7	1	1	0	23	11	9	1	6.2	25	4.025	2.19096	.	.	6.2	25	.	.	11.8	.	11.8	25.3	.	25.3	61	.	61
M 7	1	1	0	23	11	10	1	6.3	26	4.186	2.26648	.	.	6.3	26	.	.	11.6	.	11.6	24.5	.	24.5	63	.	63
M 7	1	1	0	23	11	11	1	5.8	24	3.864	2.15061	.	.	5.8	24	.	.	11.5	.	11.5	23.2	.	23.2	57	.	57
.	.	.	.	.	.	.	.	.	.	.	.	.	.	.	.	.	.	.	.	.	.	.	.	.	.	.
M 8	1	1	0	.	.	.	.	.	.	.	.	.	.	.	.	.	.	.	.	.	.	.	.	.	.	.
.	.	.	.	.	.	.	.	.	.	.	.	.	.	.	.	.	.	.	.	.	.	.	.	.		.
M 9	1	1	0	23	11	1	2	.	.	.	.	4.9	13	4.9	13	2.093	1.23226	.	12.2	12.2	.	27.6	27.6	.	62	62
M 9	1	1	0	23	11	2	2	.	.	.	.	5.8	12	5.8	12	1.932	1.0753	.	11.8	11.8	.	27.8	27.8	.	67	67
M 9	1	1	0	23	11	3	2	.	.	.	.	6.1	12	6.1	12	1.932	1.05738	.	12.2	12.2	.	28	28	.	67	67
M 9	1	1	0	23	11	4	2	.	.	.	.	5.3	13	5.3	13	2.093	1.20045	.	11.3	11.3	.	26.5	26.5	.	60	60
M 9	1	1	0	23	11	5	2	.	.	.	.	6	12	6	12	1.932	1.06322	.	12.2	12.2	.	27.4	27.4	.	64	64
M 9	1	1	0	23	11	6	2	.	.	.	.	6.5	12	6.5	12	1.932	1.03523	.	12.9	12.9	.	25.1	25.1	.	67	67
M 9	1	1	0	23	11	7	2	.	.	.	.	5.8	13	5.8	13	2.093	1.16491	.	12.5	12.5	.	27.1	27.1	.	68	68
M 9	1	1	0	23	11	8	2	.	.	.	.	5.7	13	5.7	13	2.093	1.17169	.	10.7	10.7	.	26.6	26.6	.	.	.
M 9	1	1	0	23	11	9	1	6	23	3.703	2.03784	.	.	6	23	.	.	12.6	.	12.6	28	.	28	66	.	66
M 9	1	1	0	23	11	10	1	5.8	22	3.542	1.97139	.	.	5.8	22	.	.	12	.	12	26.8	.	26.8	70	.	70
M 9	1	1	0	23	11	11	1	6.1	24	3.864	2.11476	.	.	6.1	24	.	.	11.4	.	11.4	27.9	.	27.9	65	.	65
.	.	.	.	.	.	.	.	.	.	.	.	.	.	.	.	.	.	.	.	.	.	.	.	.	.	.
M 10	1	1	0	23.5	3	1	2			.	.	6.9	13	6.9	13	2.093	1.09939	.	13	13	.	27.3	27.3	.	60	60
M 10	1	1	0	23.5	3	2	2			.	.	6.8	14	6.8	14	2.254	1.18974	.	13.1	13.1	.	27.2	27.2	.	.	.
M 10	1	1	0	23.5	3	3	1	6.7	25	4.025	2.13505			6.7	25	.	.	13.4	.	13.4	26.6		26.6	.	.	.
.	.	.	.	.	.	.	.	.	.	.	.	.	.	.	.	.	.	.	.	.	.	.	.	.		.
M 11	2	1	40	23	11	1	2	.	.	.	.	5.3	11	5.3	11	1.771	1.01577	.	11.6	11.6	.	26.8	26.8	.	62	62
M 11	2	1	40	23	11	2	2	.	.	.	.	6.4	11	6.4	11	1.771	0.953876	.	11	11	.	28.6	28.6	.	.	.
M 11	2	1	40	23	11	3	1	6.3	20	3.22	1.74345	.	.	6.3	20	.	.	11.8	.	11.8	28.9	.	28.9	.	.	.
M 11	2	1	40	23	11	4	1	6.4	20	3.22	1.73432	.	.	6.4	20	.	.	10.9	.	10.9	28.5	.	28.5	72	.	72
M 11	2	1	40	23	11	5	1	6.1	20	3.22	1.7623	.	.	6.1	20	.	.	12.2	.	12.2	27.9	.	27.9	74	.	74
M 11	2	1	40	23	11	6	1	6	20	3.22	1.77203	.	.	6	20	.	.	11.8	.	11.8	28.9	.	28.9	71	.	71
M 11	2	1	40	23	11	7	1	5.6	20	3.22	1.81326	.	.	5.6	20	.	.	11.6	.	11.6	27.9	.	27.9	67	.	67
M 11	2	1	40	23	11	8	1	6.2	20	3.22	1.75277	.	.	6.2	20	.	.	11.6	.	11.6	29.1	.	29.1	65	.	65
M 11	2	1	40	23	11	9	1	6.3	21	3.381	1.83062	.	.	6.3	21	.	.	11.9	.	11.9	27.3	.	27.3	69	.	69
M 11	2	1	40	23	11	10	1	6.1	20	3.22	1.7623	.	.	6.1	20	.	.	12.1	.	12.1	28.5	.	28.5	72	.	72
M 11	2	1	40	23	11	11	1	6.4	22	3.542	1.90775	.	.	6.4	22	.	.	11.3	.	11.3	27.9	.	27.9	71	.	71
.	.	.	.	.	.	.	.	.	.	.	.	.	.	.	.	.	.	.	.	.	.	.	.	.	.	.
M 12	2	1	40	23	10	1	2	.	.	.	.	6.7	11	6.7	11	1.771	0.939421	.	13	13	.	28	28	.	71	71
M 12	2	1	40	23	10	2	2	.	.	.	.	6.9	11	6.9	11	1.771	0.930255	.	13.5	13.5	.	29.3	29.3	.	73	73
M 12	2	1	40	23	10	3	2	.	.	.	.	6.5	12	6.5	12	1.932	1.03523	.	14.1	14.1	.	29	29	.	73	73
M 12	2	1	40	23	10	4	2	.	.	.	.	6.5	10	6.5	10	1.61	0.86269	.	13.3	13.3	.	28.7	28.7	.	65	65
M 12	2	1	40	23	10	5	2	.	.	.	.	6.6	12	6.6	12	1.932	1.02997	.	13.1	13.1	.	30.5	30.5	.	.	.
M 12	2	1	40	23	10	6	1	6.7	20	3.22	1.70804	.	.	6.7	20	.	.	14	.	14	30.2	.	30.2	.	.	.
M 12	2	1	40	23	10	7	1	7.2	21	3.381	1.75093	.	.	7.2	21	.	.	14.3	.	14.3	29.3	.	29.3	70	.	70
M 12	2	1	40	23	10	8	1	7.1	20	3.22	1.67534	.	.	7.1	20	.	.	13.2	.	13.2	28.9	.	28.9	75	.	75
M 12	2	1	40	23	10	9	1	7.3	20	3.22	1.6599	.	.	7.3	20	.	.	14	.	14	29.4	.	29.4	73	.	73
M 12	2	1	40	23	10	10	1	6.8	21	3.381	1.78461	.	.	6.8	21	.	.	13	.	13	30.3	.	30.3	77	.	77
.	.	.	.	.	.	.	.	.	.	.	.	.	.	.	.	.	.	.	.	.	.	.	.	.	.	.
M 13	2	1	40	22	13	1	2	.	.	.	.	4.9	10	4.9	10	1.61	0.947896	.	11.8	11.8	.	24.2	24.2	.	60	60
M 13	2	1	40	22	13	2	2	.	.	.	.	4.9	11	4.9	11	1.771	1.04269	.	11.3	11.3	.	23	23	.	56	56
M 13	2	1	40	22	13	3	2	.	.	.	.	5.1	11	5.1	11	1.771	1.02887	.	11.7	11.7	.	25	25	.	61	61
M 13	2	1	40	22	13	4	2	.	.	.	.	5.2	10	5.2	10	1.61	0.929305	.	12.1	12.1	.	24.3	24.3	.	64	64
M 13	2	1	40	22	13	5	2	.	.	.	.	5.3	12	5.3	12	1.932	1.10811	.	11.3	11.3	.	23.1	23.1	.	56	56
M 13	2	1	40	22	13	6	2	.	.	.	.	5	11	5	11	1.771	1.03569	.	11.2	11.2		24.1	24.1	.	.	.
M 13	2	1	40	22	13	7	1	5	21	3.381	1.97722	.	.	5	21	.	.	11.7	.	11.7	25.7	.	25.7	.	.	.
M 13	2	1	40	22	13	8	1	5.2	22	3.542	2.04447	.	.	5.2	22	.	.	12.9	.	12.9	24.8	.	24.8	61	.	61
M 13	2	1	40	22	13	9	1	5.5	22	3.542	2.0066	.	.	5.5	22	.	.	13.2	.	13.2	24.6	.	24.6	63	.	63
M 13	2	1	40	22	13	10	1	5.4	21	3.381	1.92714	.	.	5.4	21	.	.	11.8	.	11.8	22.9	.	22.9	62	.	62
M 13	2	1	40	22	13	11	1	5.3	19	3.059	1.7545	.	.	5.3	19	.	.	12.2	.	12.2	25.5	.	25.5	61	.	61
M 13	2	1	40	22	13	12	1	5.6	20	3.22	1.81326	.	.	5.6	20	.	.	12	.	12	24	.	24	57	.	57
M 13	2	1	40	22	13	13	1	4.9	21	3.381	1.99058	.	.	4.9	21	.	.	12.4	.	12.4	26.9	.	26.9	61	.	61
.	.	.	.	.	.	.	.	.	.	.	.	.	.	.	.	.	.	.	.	.	.	.	.	.	.	.
M 14	2	1	40	23	13	1	2	.	.	.	.	5.8	10	5.8	10	1.61	0.896086	.	11.2	11.2	.	26.2	26.2	.	70	70
M 14	2	1	40	23	13	2	2	.	.	.	.	6	11	6	11	1.771	0.974619	.	11.2	11.2	.	27.3	27.3	.	67	67
M 14	2	1	40	23	13	3	2	.	.	.	.	6.2	12	6.2	12	1.932	1.05166	.	11.4	11.4	.	27.5	27.5	.	65	65
M 14	2	1	40	23	13	4	2	.	.	.	.	6.1	12	6.1	12	1.932	1.05738	.	10.9	10.9	.	28	28	.	.	.
M 14	2	1	40	23	13	5	1	5.1	20	3.22	1.87068	.	.	5.1	20	.	.	10	.	10	26.9	.	26.9	.	.	.
M 14	2	1	40	23	13	6	1	5.6	21	3.381	1.90392	.	.	5.6	21	.	.	10.3	.	10.3	23.9	.	23.9	67	.	67
M 14	2	1	40	23	13	7	1	5.4	22	3.542	2.01891	.	.	5.4	22	.	.	10	.	10	25.2	.	25.2	67	.	67
M 14	2	1	40	23	13	8	1	5.2	21	3.381	1.95154	.	.	5.2	21	.	.	10.3	.	10.3	25.3	.	25.3	65	.	65
M 14	2	1	40	23	13	9	1	6.2	21	3.381	1.84041	.	.	6.2	21	.	.	10.9	.	10.9	28.8	.	28.8	70	.	70
M 14	2	1	40	23	13	10	1	5.6	21	3.381	1.90392	.	.	5.6	21	.	.	11.8	.	11.8	27	.	27	63	.	63
M 14	2	1	40	23	13	11	1	6.4	22	3.542	1.90775	.	.	6.4	22	.	.	10.6	.	10.6	26	.	26	73	.	73
M 14	2	1	40	23	13	12	1	6.3	21	3.381	1.83062	.	.	6.3	21	.	.	10.5	.	10.5	27.9	.	27.9	69	.	69
M 14	2	1	40	23	13	13	1	5.9	21	3.381	1.87109	.	.	5.9	21	.	.	11	.	11	26.2	.	26.2	63	.	63
.	.	.	.	.	.	.	.	.	.	.	.	.	.	.	.	.	.	.	.	.	.	.	.	.	.	.
M 15	2	1	40	23	10	1	2	.	.	.	.	5	12	5	12	1.932	1.12984	.	10.6	10.6	.	24	24	.	58	58
M 15	2	1	40	23	10	2	2	.	.	.	.	5.4	10	5.4	10	1.61	0.917687	.	10.1	10.1	.	23.4	23.4	.	60	60
M 15	2	1	40	23	10	3	2	.	.	.	.	5	10	5	10	1.61	0.941534	.	10.2	10.2	.	23.6	23.6	.	58	58
M 15	2	1	40	23	10	4	2	.	.	.	.	5	12	5	12	1.932	1.12984	.	10.2	10.2	.	22.8	22.8	.	59	59
M 15	2	1	40	23	10	5	2	.	.	.	.	5	11	5	11	1.771	1.03569	.	10.9	10.9	.	23.7	23.7	.	.	.
M 15	2	1	40	23	10	6	1	5	23	3.703	2.16553	.	.	5	23	.	.	10.5	.	10.5	20.9	.	20.9	.	.	.
M 15	2	1	40	23	10	7	1	6.1	22	3.542	1.93853	.	.	6.1	22	.	.	11.8	.	11.8	22.6	.	22.6	57	.	57
M 15	2	1	40	23	10	8	1	4.9	20	3.22	1.89579	.	.	4.9	20	.	.	10.4	.	10.4	23.4	.	23.4	62	.	62
M 15	2	1	40	23	10	9	1	5.4	21	3.381	1.92714	.	.	5.4	21	.	.	9.9	.	9.9	24.3	.	24.3	60	.	60
M 15	2	1	40	23	10	10	1	5.7	22	3.542	1.98285	.	.	5.7	22	.	.	8.8	.	8.8	24.7	.	24.7	54	.	54
.	.	.	.	.	.	.	.	.	.	.	.	.	.	.	.	.	.	.	.	.	.	.	.	.	.	.
M 16	2	1	40	.	.	.	.	.	.	.	.	.	.	.	.	.	.	.	.	.	.	.	.	.	.	.
.	.	.	.	.	.	.	.	.	.	.	.	.	.	.	.	.	.	.	.	.	.	.	.	.	.	.
M 17	2	1	40	23	12	1	2	.	.	.	.	6.3	13	6.3	13	2.093	1.13324	.	11.3	11.3	.	25.2	25.2	.	61	61
M 17	2	1	40	23	12	2	2	.	.	.	.	5.5	11	5.5	11	1.771	1.0033	.	11.1	11.1	.	25.6	25.6	.	64	64
M 17	2	1	40	23	12	3	2	.	.	.	.	6	11	6	11	1.771	0.974619	.	10.8	10.8	.	26.8	26.8	.	60	60
M 17	2	1	40	23	12	4	2	.	.	.	.	6.6	12	6.6	12	1.932	1.02997	.	10.7	10.7	.	25.1	25.1	.	65	65
M 17	2	1	40	23	12	5	2	.	.	.	.	6.1	12	6.1	12	1.932	1.05738	.	10.6	10.6	.	25.4	25.4	.	63	63
M 17	2	1	40	23	12	6	2	.	.	.	.	5.9	12	5.9	12	1.932	1.06919	.	11.8	11.8	.	25.3	25.3	.	65	65
M 17	2	1	40	23	12	7	2	.	.	.	.	5.5	12	5.5	12	1.932	1.09451	.	11.7	11.7	.	25.7	25.7	.	.	.
M 17	2	1	40	23	12	8	1	6.2	22	3.542	1.92805	.	.	6.2	22	.	.	11.5	.	11.5	25.8	.	25.8	.	.	.
M 17	2	1	40	23	12	9	1	5.8	22	3.542	1.97139	.	.	5.8	22	.	.	12.8	.	12.8	25.9	.	25.9	64	.	64
M 17	2	1	40	23	12	10	1	6	22	3.542	1.94924	.	.	6	22	.	.	11.1	.	11.1	25	.	25	64	.	64
M 17	2	1	40	23	12	11	1	6.4	22	3.542	1.90775	.	.	6.4	22	.	.	11.3	.	11.3	26.2	.	26.2	63	.	63
M 17	2	1	40	23	12	12	1	6.1	23	3.703	2.02664	.	.	6.1	23	.	.	11.5	.	11.5	25.5	.	25.5	66	.	66
.	.	.	.	.	.	.	.	.	.	.	.	.	.	.	.	.	.	.	.	.	.	.	.	.	.	.
M 18	2	1	40	23	8	1	2	.	.	.	.	6.9	12	6.9	12	1.932	1.01482	.	14.1	14.1	.	30.5	30.5	.	71	71
M 18	2	1	40	23	8	2	2	.	.	.	.	7.3	13	7.3	13	2.093	1.07893	.	13.8	13.8	.	31.4	31.4	.	71	71
M 18	2	1	40	23	8	3	2	.	.	.	.	6.6	11	6.6	11	1.771	0.944142	.	14.1	14.1	.	31.2	31.2	.	69	69
M 18	2	1	40	23	8	4	2	.	.	.	.	6.1	12	6.1	12	1.932	1.05738	.	12.7	12.7	.	30	30	.	75	75
M 18	2	1	40	23	8	5	2	.	.	.	.	6.5	13	6.5	13	2.093	1.1215	.	13	13	.	31.8	31.8	.	.	.
M 18	2	1	40	23	8	6	1	7	23	3.703	1.93577	.	.	7	23	.	.	14.5	.	14.5	31.8	.	31.8	.	.	.
M 18	2	1	40	23	8	7	1	7.1	24	3.864	2.01041	.	.	7.1	24	.	.	14.3	.	14.3	32.4	.	32.4	79	.	79
M 18	2	1	40	23	8	8	1	7.1	22	3.542	1.84287	.	.	7.1	22	.	.	13.7	.	13.7	31.7	.	31.7	76	.	76
.	.	.	.	.	.	.	.	.	.	.	.	.	.	.	.	.	.	.	.	.	.	.	.	.	.	.
M 19	2	1	40	23	12	1	2	.	.	.	.	4.9	12	4.9	12	1.932	1.13747	.	9.8	9.8	.	23.7	23.7	.	62	62
M 19	2	1	40	23	12	2	2	.	.	.	.	5.6	12	5.6	12	1.932	1.08796	.	10.8	10.8	.	24.6	24.6	.	62	62
M 19	2	1	40	23	12	3	2	.	.	.	.	5.9	11	5.9	11	1.771	0.980094	.	10.7	10.7	.	24.1	24.1	.	60	60
M 19	2	1	40	23	12	4	2	.	.	.	.	5.8	11	5.8	11	1.771	0.985695	.	10.3	10.3	.	24.4	24.4	.	58	58
M 19	2	1	40	23	12	5	2	.	.	.	.	5.6	12	5.6	12	1.932	1.08796	.	9.3	9.3	.	22.4	22.4	.	59	59
M 19	2	1	40	23	12	6	2	.	.	.	.	5.7	12	5.7	12	1.932	1.08156	.	9.3	9.3	.	22.4	22.4	.	.	.
M 19	2	1	40	23	12	7	1	5.8	21	3.381	1.88178	.	.	5.8	21	.	.	9.9	.	9.9	24.3	.	24.3	.	.	.
M 19	2	1	40	23	12	8	1	6	22	3.542	1.94924	.	.	6	22	.	.	10.5	.	10.5	24	.	24	58	.	58
M 19	2	1	40	23	12	9	1	5.3	23	3.703	2.12387	.	.	5.3	23	.	.	10.1	.	10.1	22.1	.	22.1	59	.	59
M 19	2	1	40	23	12	10	1	5.5	21	3.381	1.91539	.	.	5.5	21	.	.	11	.	11	22.9	.	22.9	63	.	63
M 19	2	1	40	23	12	11	1	5.6	20	3.22	1.81326	.	.	5.6	20	.	.	9.5	.	9.5	22.8	.	22.8	63	.	63
M 19	2	1	40	23	12	12	1	6.2	21	3.381	1.84041	.	.	6.2	21	.	.	10.3	.	10.3	24.1	.	24.1	61	.	61
.	.	.	.	.	.	.	.	.	.	.	.	.	.	.	.	.	.	.	.	.	.	.	.	.	.	.
M 20	2	1	40	23	3	1	2	.	.	.	.	6.4	12	6.4	12	1.932	1.04059	.	16.7	16.7	.	41.1	41.1	.	75	75
M 20	2	1	40	23	3	2	2	.	.	.	.	6.9	12	6.9	12	1.932	1.01482	.	15.9	15.9	.	39.8	39.8	.
M 20	2	1	40	23	3	3	1	7.1	25	4.025	2.09418	.	.	7.1	25	.	.	17.6		17.6	41.1		41.1	.
.	.	.	.	.	.	.	.	.	.	.	.	.	.	.	.	.	.	.	.	.	.	.	.	.		.
M 21	2	1	40	23	14	1	2	.	.	.	.	5.7	12	5.7	12	1.932	1.08156	.	9.8	9.8		22	22	.	55	55
M 21	2	1	40	23	14	2	2	.	.	.	.	6	12	6	12	1.932	1.06322	.	10.8	10.8		21	21	.	52	52
M 21	2	1	40	23	14	3	2	.	.	.	.	5.3	11	5.3	11	1.771	1.01577	.	9.9	9.9		22.2	22.2	.	58	58
M 21	2	1	40	23	14	4	2	.	.	.	.	5.8	11	5.8	11	1.771	0.985695	.	9	9		21.1	21.1	.	52	52
M 21	2	1	40	23	14	5	2	.	.	.	.	5.3	10	5.3	10	1.61	0.923423	.	9.9	9.9		19.9	19.9	.	53	53
M 21	2	1	40	23	14	6	2	.	.	.	.	5.7	11	5.7	11	1.771	0.991426	.	9.6	9.6		21.7	21.7	.	55	55
M 21	2	1	40	23	14	7	2	.	.	.	.	5.5	12	5.5	12	1.932	1.09451	.	9.4	9.4		20.6	20.6	.	52	52
M 21	2	1	40	23	14	8	2	.	.	.	.	5	12	5	12	1.932	1.12984	.	9.5	9.5		20.7	20.7	.	53	53
M 21	2	1	40	23	14	9	2	.	.	.	.	5.3	11	5.3	11	1.771	1.01577	.	9.8	9.8		21.1	21.1	.	.	.
M 21	2	1	40	23	14	10	1	5.4	22	3.542	2.01891	.	.	5.4	22	.	.	9.7	.	9.7	22.5	.	22.5	.	.	.
M 21	2	1	40	23	14	11	1	5.7	20	3.22	1.80259	.	.	5.7	20	.	.	10	.	10	22.2	.	22.2	55	.	55
M 21	2	1	40	23	14	12	1	5.2	20	3.22	1.85861	.	.	5.2	20	.	.	9.2	.	9.2	22.3	.	22.3	51	.	51
M 21	2	1	40	23	14	13	1	5.6	22	3.542	1.99458	.	.	5.6	22	.	.	10.2	.	10.2	19.7	.	19.7	52	.	52
M 21	2	1	40	23	14	14	1	5.8	22	3.542	1.97139	.	.	5.8	22	.	.	9.2	.	9.2	22.3	.	22.3	56	.	56
.	.	.	.	.	.	.	.	.	.	.	.	.	.	.	.	.	.	.	.	.	.	.	.	.	.	.
M 22	2	1	40	23	10	1	2	.	.	.	.	6.6	11	6.6	11	1.771	0.944142	.	14	14	.	34	34	.	68	68
M 22	2	1	40	23	10	2	2	.	.	.	.	6.8	12	6.8	12	1.932	1.01977	.	14.5	14.5	.	33.8	33.8	.	74	74
M 22	2	1	40	23	10	3	2	.	.	.	.	6.5	12	6.5	12	1.932	1.03523	.	14.3	14.3	.	32.2	32.2	.	.	.
M 22	2	1	40	23	10	4	1	6.6	22	3.542	1.88828	.	.	6.6	22	.	.	14.8	.	14.8	34.9	.	34.9	.	.	.
M 22	2	1	40	23	10	5	1	7.5	22	3.542	1.80951	.	.	7.5	22	.	.	14.6	.	14.6	34.4	.	34.4	75	.	75
M 22	2	1	40	23	10	6	1	6.6	21	3.381	1.80245	.	.	6.6	21	.	.	15.7	.	15.7	33.8	.	33.8	75	.	75
M 22	2	1	40	23	10	7	1	6.3	22	3.542	1.91779	.	.	6.3	22	.	.	13.1	.	13.1	34.5	.	34.5	72	.	72
M 22	2	1	40	23	10	8	1	7	21	3.381	1.76744	.	.	7	21	.	.	14.9	.	14.9	34.3	.	34.3	75	.	75
M 22	2	1	40	23	10	9	1	6.8	21	3.381	1.78461	.	.	6.8	21	.	.	15.2	.	15.2	29.7	.	29.7	76	.	76
M 22	2	1	40	23	10	10	1	7.4	21	3.381	1.73501	.	.	7.4	21	.	.	15.6	.	15.6	34.1	.	34.1	74	.	74
.	.	.	.	.	.	.	.	.	.	.	.	.	.	.	.	.	.	.	.	.	.	.	.	.	.	.
M 23	3	1	60	23	14	1	2	.	.	.	.	6.7	13	6.7	13	2.093	1.11022	.	10.1	10.1	.	19	19	.	55	55
M 23	3	1	60	23	14	2	2	.	.	.	.	6.3	12	6.3	12	1.932	1.04607	.	9	9	.	22.3	22.3	.	51	51
M 23	3	1	60	23	14	3	2	.	.	.	.	5.5	12	5.5	12	1.932	1.09451	.	9.5	9.5	.	19	19	.	52	52
M 23	3	1	60	23	14	4	2	.	.	.	.	6	11	6	11	1.771	0.974619	.	9.3	9.3	.	19.9	19.9	.	52	52
M 23	3	1	60	23	14	5	2	.	.	.	.	6.1	12	6.1	12	1.932	1.05738	.	10	10	.	20.1	20.1	.	53	53
M 23	3	1	60	23	14	6	2	.	.	.	.	6	13	6	13	2.093	1.15182	.	9.6	9.6	.	20	20	.	52	52
M 23	3	1	60	23	14	7	2	.	.	.	.	6.1	13	6.1	13	2.093	1.14549	.	9.9	9.9	.	18.4	18.4	.	.	.
M 23	3	1	60	23	14	8	1	6.4	22	3.542	1.90775	.	.	6.4	22	.	.	9.3	.	9.3	20	.	20	.	.	.
M 23	3	1	60	23	14	9	1	6.7	22	3.542	1.87884	.	.	6.7	22	.	.	9.9	.	9.9	20.3	.	20.3	52	.	52
M 23	3	1	60	23	14	10	1	5.9	22	3.542	1.96019	.	.	5.9	22	.	.	10.7	.	10.7	19.4	.	19.4	52	.	52
M 23	3	1	60	23	14	11	1	5.7	23	3.703	2.07298	.	.	5.7	23	.	.	10.5	.	10.5	21.8	.	21.8	59	.	59
M 23	3	1	60	23	14	12	1	5.8	23	3.703	2.061	.	.	5.8	23	.	.	9.8	.	9.8	21.3	.	21.3	53	.	53
M 23	3	1	60	23	14	13	1	6.4	22	3.542	1.90775	.	.	6.4	22	.	.	9.9	.	9.9	22.9	.	22.9	55	.	55
M 23	3	1	60	23	14	14	1	6.7	22	3.542	1.87884	.	.	6.7	22	.	.	9.4	.	9.4	22	.	22	61	.	61
.	.	.	.	.	.	.	.	.	.	.	.	.	.	.	.	.	.	.	.	.	.	.	.	.	.	.
M 24	3	1	60	23	13	1	2	.	.	.	.	5.6	11	5.6	11	1.771	0.997292	.	9.1	9.1	.	25	25	.	62	62
M 24	3	1	60	23	13	2	2	.	.	.	.	5.9	12	5.9	12	1.932	1.06919	.	10.2	10.2	.	23.6	23.6	.	63	63
M 24	3	1	60	23	13	3	2	.	.	.	.	5.2	12	5.2	12	1.932	1.11517	.	9.6	9.6	.	24.8	24.8	.	58	58
M 24	3	1	60	23	13	4	2	.	.	.	.	5.2	12	5.2	12	1.932	1.11517	.	9.6	9.6	.	23	23	.	59	59
M 24	3	1	60	23	13	5	2	.	.	.	.	5.4	12	5.4	12	1.932	1.10122	.	9.2	9.2	.	24.4	24.4	.	57	57
M 24	3	1	60	23	13	6	2	.	.	.	.	5.7	12	5.7	12	1.932	1.08156	.	9.9	9.9	.	23.3	23.3	.	.	.
M 24	3	1	60	23	13	7	1	5.4	22	3.542	2.01891	.	.	5.4	22	.	.	9.9	.	9.9	25	.	25	.	.	.
M 24	3	1	60	23	13	8	1	5.5	24	3.864	2.18902	.	.	5.5	24	.	.	10.6	.	10.6	22.9	.	22.9	58	.	58
M 24	3	1	60	23	13	9	1	5.3	24	3.864	2.21621	.	.	5.3	24	.	.	10.3	.	10.3	25	.	25	53	.	53
M 24	3	1	60	23	13	10	1	5.9	24	3.864	2.13839	.	.	5.9	24	.	.	9	.	9	24.7	.	24.7	58	.	58
M 24	3	1	60	23	13	11	1	5.7	23	3.703	2.07298	.	.	5.7	23	.	.	9.5	.	9.5	23.6	.	23.6	60	.	60
M 24	3	1	60	23	13	12	1	6.4	25	4.025	2.1679	.	.	6.4	25	.	.	8.9	.	8.9	24.3	.	24.3	61	.	61
M 24	3	1	60	23	13	13	1	6.1	24	3.864	2.11476	.	.	6.1	24	.	.	9.8	.	9.8	23.8	.	23.8	57	.	57
.	.	.	.	.	.	.	.	.	.	.	.	.	.	.	.	.	.	.	.	.	.	.	.	.	.	.
M 25	3	1	60	23	13	1	2	.	.	.	.	5.4	12	5.4	12	1.932	1.10122	.	9.6	9.6	.	23.5	23.5	.	59	59
M 25	3	1	60	23	13	2	2	.	.	.	.	5.5	12	5.5	12	1.932	1.09451	.	10.2	10.2	.	24	24	.	55	55
M 25	3	1	60	23	13	3	2	.	.	.	.	5.4	13	5.4	13	2.093	1.19299	.	9.9	9.9	.	23.6	23.6	.	56	56
M 25	3	1	60	23	13	4	2	.	.	.	.	5.3	13	5.3	13	2.093	1.20045	.	10.4	10.4	.	22.3	22.3	.	54	54
M 25	3	1	60	23	13	5	2	.	.	.	.	5.4	12	5.4	12	1.932	1.10122	.	9.7	9.7	.	23.4	23.4	.	.	.
M 25	3	1	60	23	13	6	1	5.6	23	3.703	2.08525	.	.	5.6	23	.	.	10.5	.	10.5	24.4	.	24.4	.	.	.
M 25	3	1	60	23	13	7	1	5.4	23	3.703	2.11068	.	.	5.4	23	.	.	10.2	.	10.2	22.6	.	22.6	60	.	60
M 25	3	1	60	23	13	8	1	6	24	3.864	2.12644	.	.	6	24	.	.	11.1	.	11.1	24.9	.	24.9	62	.	62
M 25	3	1	60	23	13	9	1	5.3	22	3.542	2.03153	.	.	5.3	22	.	.	9.8	.	9.8	24	.	24	58	.	58
M 25	3	1	60	23	13	10	1	5.5	23	3.703	2.09781	.	.	5.5	23	.	.	9.6	.	9.6	25.5	.	25.5	56	.	56
M 25	3	1	60	23	13	11	1	5.2	23	3.703	2.1374	.	.	5.2	23	.	.	10	.	10	23.5	.	23.5	61	.	61
M 25	3	1	60	23	13	12	1	5.6	22	3.542	1.99458	.	.	5.6	22	.	.	10.3	.	10.3	26.2	.	26.2	61	.	61
M 25	3	1	60	23	13	13	1	5.2	24	3.864	2.23033	.	.	5.2	24	.	.	10	.	10	24	.	24	59	.	59
.	.	.	.	.	.	.	.	.	.	.	.	.	.	.	.	.	.	.	.	.	.	.	.	.	.	.
M 26	3	1	60	23	10	1	2	.	.	.	.	6.6	13	6.6	13	2.093	1.1158	.	13.3	13.3	.	28.7	28.7	.	65	65
M 26	3	1	60	23	10	2	2	.	.	.	.	6.2	13	6.2	13	2.093	1.1393	.	12.5	12.5	.	27.6	27.6	.	70	70
M 26	3	1	60	23	10	3	2	.	.	.	.	6	13	6	13	2.093	1.15182	.	13.1	13.1	.	26.7	26.7	.	67	67
M 26	3	1	60	23	10	4	2	.	.	.	.	5.8	13	5.8	13	2.093	1.16491	.	13.2	13.2	.	27.9	27.9	.	66	66
M 26	3	1	60	23	10	5	2	.	.	.	.	5.9	13	5.9	13	2.093	1.15829	.	12.6	12.6	.	28.2	28.2	.	67	67
M 26	3	1	60	23	10	6	2	.	.	.	.	6.6	12	6.6	12	1.932	1.02997	.	11.9	11.9	.	27.3	27.3	.	.
M 26	3	1	60	23	10	7	1	6.7	24	3.864	2.04965	.	.	6.7	24	.	.	13.6	.	13.6	27.8	.	27.8	.	.
M 26	3	1	60	23	10	8	1	6.6	23	3.703	1.97411	.	.	6.6	23	.	.	13.2	.	13.2	28.6	.	28.6	68	.	68
M 26	3	1	60	23	10	9	1	6.6	22	3.542	1.88828	.	.	6.6	22	.	.	12.9	.	12.9	26.6	.	26.6	74	.	74
M 26	3	1	60	23	10	10	1	6.4	22	3.542	1.90775	.	.	6.4	22	.	.	12.4	.	12.4	29.1	.	29.1	69	.	69
.	.	.	.	.	.	.	.	.	.	.	.	.	.	.	.	.	.	.	.	.	.	.	.	.	.	.
M 27	3	1	60	.	.	.	.	.	.	.	.	.	.	.	.	.	.	.	.	.	.	.	.	.	.	.
.	.	.	.	.	.	.	.	.	.	.	.	.	.	.	.	.	.	.	.	.	.	.	.	.	.	.
M 28	3	1	60	23.5	11	1	2	.	.	.	.	6.2	12	6.2	12	1.932	1.05166	.	11.1	11.1	.	24.4	24.4	.	60	60
M 28	3	1	60	23.5	11	2	2	.	.	.	.	5.7	12	5.7	12	1.932	1.08156	.	12	12	.	24.5	24.5	.	63	63
M 28	3	1	60	23.5	11	3	2	.	.	.	.	6.7	12	6.7	12	1.932	1.02482	.	11.4	11.4	.	22.8	22.8	.	61	61
M 28	3	1	60	23.5	11	4	2	.	.	.	.	6.2	12	6.2	12	1.932	1.05166	.	11.5	11.5	.	24.2	24.2	.	63	63
M 28	3	1	60	23.5	11	5	2	.	.	.	.	5.9	11	5.9	11	1.771	0.980094	.	11.8	11.8	.	23.1	23.1	.	62	62
M 28	3	1	60	23.5	11	6	2	.	.	.	.	6.1	11	6.1	11	1.771	0.969264	.	11.1	11.1	.	23.4	23.4	.	.	.
M 28	3	1	60	23.5	11	7	1	6	22	3.542	1.94924	.	.	6	22	.	.	10.2	.	10.2	22.7	.	22.7	.	.	.
M 28	3	1	60	23.5	11	8	1	6	23	3.703	2.03784	.	.	6	23	.	.	12	.	12	25	.	25	62	.	62
M 28	3	1	60	23.5	11	9	1	5.4	22	3.542	2.01891	.	.	5.4	22	.	.	12.1	.	12.1	25.4	.	25.4	60	.	60
M 28	3	1	60	23.5	11	10	1	6.9	24	3.864	2.02965	.	.	6.9	24	.	.	11.5	.	11.5	24.1	.	24.1	64	.	64
M 28	3	1	60	23.5	11	11	1	6.6	23	3.703	1.97411	.	.	6.6	23	.	.	11.2	.	11.2	22.3	.	22.3	60	.	60
.	.	.	.	.	.	.	.	.	.	.	.	.	.	.	.	.	.	.	.	.	.	.	.	.	.	.
M 29	3	1	60	23	14	1	2	.	.	.	.	5.1	12	5.1	12	1.932	1.12241	.	8	8	.	18.8	18.8	.	45	45
M 29	3	1	60	23	14	2	2	.	.	.	.	4.9	12	4.9	12	1.932	1.13747	.	8.1	8.1	.	19	19	.	50	50
M 29	3	1	60	23	14	3	2	.	.	.	.	4.9	12	4.9	12	1.932	1.13747	.	8	8	.	19.8	19.8	.	53	53
M 29	3	1	60	23	14	4	2	.	.	.	.	4.9	12	4.9	12	1.932	1.13747	.	8.8	8.8	.	17.7	17.7	.	46	46
M 29	3	1	60	23	14	5	2	.	.	.	.	5.1	12	5.1	12	1.932	1.12241	.	7.6	7.6	.	20.4	20.4	.	46	46
M 29	3	1	60	23	14	6	2	.	.	.	.	5	12	5	12	1.932	1.12984	.	7.8	7.8	.	21.3	21.3	.	.	.
M 29	3	1	60	23	14	7	1	5.2	22	3.542	2.04447	.	.	5.2	22	.	.	8.8	.	8.8	17.4	.	17.4	.	.	.
M 29	3	1	60	23	14	8	1	5.4	22	3.542	2.01891	.	.	5.4	22	.	.	7.4	.	7.4	20.5	.	20.5	45	.	45
M 29	3	1	60	23	14	9	1	5.3	22	3.542	2.03153	.	.	5.3	22	.	.	7.7	.	7.7	20.2	.	20.2	47	.	47
M 29	3	1	60	23	14	10	1	4.8	23	3.703	2.1952	.	.	4.8	23	.	.	8.1	.	8.1	20.2	.	20.2	52	.	52
M 29	3	1	60	23	14	11	1	5.6	23	3.703	2.08525	.	.	5.6	23	.	.	7.9	.	7.9	20	.	20	46	.	46
M 29	3	1	60	23	14	12	1	5	22	3.542	2.07137	.	.	5	22	.	.	7.9	.	7.9	20.7	.	20.7	50	.	50
M 29	3	1	60	23	14	13	1	5.2	21	3.381	1.95154	.	.	5.2	21	.	.	8.3	.	8.3	19.8	.	19.8	51	.	51
M 29	3	1	60	23	14	14	1	5.4	22	3.542	2.01891	.	.	5.4	22	.	.	8.8	.	8.8	20.7	.	20.7	51	.	51
.	.	.	.	.	.	.	.	.	.	.	.	.	.	.	.	.	.	.	.	.	.	.	.	.	.	.
M 30	3	1	60	23	11	1	2	.	.	.	.	5.9	12	5.9	12	1.932	1.06919	.	10.8	10.8	.	25.4	25.4	.	59	59
M 30	3	1	60	23	11	2	2	.	.	.	.	5.7	12	5.7	12	1.932	1.08156	.	11	11	.	25.3	25.3	.	65	65
M 30	3	1	60	23	11	3	2	.	.	.	.	6	12	6	12	1.932	1.06322	.	10.9	10.9	.	26.4	26.4	.	63	63
M 30	3	1	60	23	11	4	2	.	.	.	.	5.8	12	5.8	12	1.932	1.0753	.	11.2	11.2	.	24.9	24.9	.	62	62
M 30	3	1	60	23	11	5	2	.	.	.	.	5.9	12	5.9	12	1.932	1.06919	.	11.3	11.3	.	25.8	25.8	.	61	61
M 30	3	1	60	23	11	6	2	.	.	.	.	6.3	12	6.3	12	1.932	1.04607	.	11	11	.	25.4	25.4	.	62	62
M 30	3	1	60	23	11	7	2	.	.	.	.	5.7	12	5.7	12	1.932	1.08156	.	11	11	.	26.1	26.1	.	.	.
M 30	3	1	60	23	11	8	1	6	23	3.703	2.03784	.	.	6	23	.	.	11.4	.	11.4	24.3	.	24.3	.	.	.
M 30	3	1	60	23	11	9	1	5.7	22	3.542	1.98285	.	.	5.7	22	.	.	10.2	.	10.2	24.4	.	24.4	60	.	60
M 30	3	1	60	23	11	10	1	6	24	3.864	2.12644	.	.	6	24	.	.	11.3	.	11.3	25.6	.	25.6	62	.	62
M 30	3	1	60	23	11	11	1	6.5	23	3.703	1.98419	.	.	6.5	23	.	.	10.8	.	10.8	25.9	.	25.9	63	.	63
.	.	.	.	.	.	.	.	.	.	.	.	.	.	.	.	.	.	.	.	.	.	.	.	.	.	.
M 31	3	1	60	23	4	1	2	.	.	.	.	6.1	11	6.1	11	1.771	0.969264		13.1	13.1		36.2	36.2	.	75	75
M 31	3	1	60	23	4	2	2	.	.	.	.	6	11	6	11	1.771	0.974619		14.7	14.7		33.4	33.4	.	.	.
M 31	3	1	60	23	4	3	1	6.1	22	3.542	1.93853	.	.	6.1	22	.	.	14.1	.	14.1	34.8		34.8	.	.	.
M 31	3	1	60	23	4	4	1	5.9	22	3.542	1.96019	.	.	5.9	22	.	.	13.5	.	13.5	33.9		33.9	77	.	77
.	.	.	.	.	.	.	.	.	.	.	.	.	.	.	.	.	.	.	.	.	.	.	.	.	.	.
M 32	3	1	60	23	11	1	2	.	.	.	.	5.4	12	5.4	12	1.932	1.10122	.	9.7	9.7	.	.	.	.	.	.
M 32	3	1	60	23	11	2	2	.	.	.	.	5.8	12	5.8	12	1.932	1.0753	.	8.9	8.9	.	.	.	.	.	.
M 32	3	1	60	23	11	3	2	.	.	.	.	5.7	12	5.7	12	1.932	1.08156	.	10.1	10.1	.	.	.	.	.	.
M 32	3	1	60	23	11	4	2	.	.	.	.	5.4	13	5.4	13	2.093	1.19299	.	10.2	10.2	.	.	.	.	.	.
M 32	3	1	60	23	11	5	2	.	.	.	.	6.1	13	6.1	13	2.093	1.14549	.	8.5	8.5	.	.	.	.	.	.
M 32	3	1	60	23	11	6	1	6.1	23	3.703	2.02664	.	.	6.1	23	.	.	10.2	.	10.2	.	.	.	.	.	.
M 32	3	1	60	23	11	7	1	5.9	21	3.381	1.87109	.	.	5.9	21	.	.	10.5	.	10.5	.	.	.	.	.	.
M 32	3	1	60	23	11	8	1	6.3	21	3.381	1.83062	.	.	6.3	21	.	.	10.5	.	10.5	.	.	.	.	.	.
M 32	3	1	60	23	11	9	1	5.8	21	3.381	1.88178	.	.	5.8	21	.	.	9.9	.	9.9	.	.	.	.	.	.
M 32	3	1	60	23	11	10	1	6	20	3.22	1.77203	.	.	6	20	.	.	9.5	.	9.5	.	.	.	.	.	.
M 32	3	1	60	23	11	11	1	6.3	20	3.22	1.74345	.	.	6.3	20	.	.	9.2	.	9.2	.	.	.	.	.	.
.	.	.	.	.	.	.	.	.	.	.	.	.	.	.	.	.	.	.	.	.	.	.	.	.	.	.
M 33	3	1	60	23	13	1	2	.	.	.	.	5.2	12	5.2	12	1.932	1.11517	.	10.2	10.2	.	21.7	21.7	.	54	54
M 33	3	1	60	23	13	2	2	.	.	.	.	5.1	13	5.1	13	2.093	1.21594	.	10.2	10.2	.	20.8	20.8	.	57	57
M 33	3	1	60	23	13	3	2	.	.	.	.	4.9	13	4.9	13	2.093	1.23226	.	9.8	9.8	.	22	22	.	58	58
M 33	3	1	60	23	13	4	2	.	.	.	.	4.7	12	4.7	12	1.932	1.15339	.	10.2	10.2	.	23.4	23.4	.	59	59
M 33	3	1	60	23	13	5	2	.	.	.	.	5.5	14	5.5	14	2.254	1.27693	.	10.3	10.3	.	23.7	23.7	.	56	56
M 33	3	1	60	23	13	6	2	.	.	.	.	5.8	13	5.8	13	2.093	1.16491	.	9.5	9.5	.	22.5	22.5	.	56	56
M 33	3	1	60	23	13	7	2	.	.	.	.	5.4	13	5.4	13	2.093	1.19299	.	9	9	.	23.3	23.3	.	56	56
M 33	3	1	60	23	13	8	2	.	.	.	.	5.4	12	5.4	12	1.932	1.10122	.	9.7	9.7	.	22.5	22.5	.	61	61
M 33	3	1	60	23	13	9	2	.	.	.	.	5.1	12	5.1	12	1.932	1.12241	.	9.8	9.8	.	23.1	23.1	.	.	.
M 33	3	1	60	23	13	10	1	5.5	23	3.703	2.09781	.	.	5.5	23	.	.	9.2	.	9.2	22.3	.	22.3	.	.	.
M 33	3	1	60	23	13	11	1	5.7	23	3.703	2.07298	.	.	5.7	23	.	.	10.8	.	10.8	21	.	21	54	.	54
M 33	3	1	60	23	13	12	1	5.1	23	3.703	2.15128	.	.	5.1	23	.	.	10.3	.	10.3	23.3	.	23.3	57	.	57
M 33	3	1	60	23	13	13	1	5.8	23	3.703	2.061	.	.	5.8	23	.	.	10.3	.	10.3	23.7	.	23.7	62	.	62
.	.	.	.	.	.	.	.	.	.	.	.	.	.	.	.	.	.	.	.	.	.	.	.	.	.	.
M 34	3	1	60	23	12	1	2	.	.	.	.	5.2	13	5.2	13	2.093	1.2081	.	10.3	10.3	.	26.1	26.1	.	60	60
M 34	3	1	60	23	12	2	2	.	.	.	.	5.6	13	5.6	13	2.093	1.17862	.	11.2	11.2	.	24.7	24.7	.	64	64
M 34	3	1	60	23	12	3	2	.	.	.	.	5.8	13	5.8	13	2.093	1.16491	.	11.5	11.5	.	24.3	24.3	.	61	61
M 34	3	1	60	23	12	4	2	.	.	.	.	5.8	12	5.8	12	1.932	1.0753	.	10.2	10.2	.	22.8	22.8	.	59	59
M 34	3	1	60	23	12	5	2	.	.	.	.	5.7	12	5.7	12	1.932	1.08156	.	11.3	11.3	.	24.2	24.2	.	60	60
M 34	3	1	60	23	12	6	2	.	.	.	.	5.6	13	5.6	13	2.093	1.17862	.	11.1	11.1	.	24.6	24.6	.	.	.
M 34	3	1	60	23	12	7	1	5.6	23	3.703	2.08525	.	.	5.6	23	.	.	11.6	.	11.6	24.7	.	24.7	.	.	.
M 34	3	1	60	23	12	8	1	6.2	22	3.542	1.92805	.	.	6.2	22	.	.	11.8	.	11.8	26.4	.	26.4	64	.	64
M 34	3	1	60	23	12	9	1	6.2	23	3.703	2.01569	.	.	6.2	23	.	.	11.9	.	11.9	25.2	.	25.2	64	.	64
M 34	3	1	60	23	12	10	1	5.6	23	3.703	2.08525	.	.	5.6	23	.	.	11.8	.	11.8	25.4	.	25.4	64	.	64
M 34	3	1	60	23	12	11	1	6.1	22	3.542	1.93853	.	.	6.1	22	.	.	11.5	.	11.5	24.3	.	24.3	65	.	65
M 34	3	1	60	23	12	12	1	5.7	22	3.542	1.98285	.	.	5.7	22	.	.	10.8	.	10.8	26.1	.	26.1	66	.	66
.	.	.	.	.	.	.	.	.	.	.	.	.	.	.	.	.	.	.	.	.	.	.	.	.	.	.
M 35	1	2	0	23	13	1	2	.	.	.	.	6.2	13	6.2	13	2.093	1.1393	.	11.7	11.7	.	24.9	24.9	.	.
M 35	1	2	0	23	13	2	2	.	.	.	.	6	13	6	13	2.093	1.15182	.	9.7	9.7	.	25	25	.	64.3	64.3
M 35	1	2	0	23	13	3	2	.	.	.	.	6	12	6	12	1.932	1.06322	.	10.9	10.9	.	24.3	24.3	.	65.3	65.3
M 35	1	2	0	23	13	4	2	.	.	.	.	6.1	12	6.1	12	1.932	1.05738	.	12.3	12.3	.	27.1	27.1	.	70.7	70.7
M 35	1	2	0	23	13	5	2	.	.	.	.	6.1	13	6.1	13	2.093	1.14549	.	11.5	11.5	.	26.1	26.1	.	64	64
M 35	1	2	0	23	13	6	2	.	.	.	.	6	12	6	12	1.932	1.06322	.	12.3	12.3	.	28.7	28.7	.	61.2	61.2
M 35	1	2	0	23	13	7	2	.	.	.	.	6.2	13	6.2	13	2.093	1.1393	.	12.3	12.3	.	27.9	27.9	.	67.4	67.4
M 35	1	2	0	23	13	8	2	.	.	.	.	5	12	5	12	1.932	1.12984	.	12.1	12.1	.	24.6	24.6	.	63.5	63.5
M 35	1	2	0	23	13	9	2	.	.	.	.	6.1	12	6.1	12	1.932	1.05738	.	12.6	12.6	.	29.2	29.2	.	65.1	65.1
M 35	1	2	0	23	13	10	2	.	.	.	.	5.6	12	5.6	12	1.932	1.08796	.	11.7	11.7	.	24.5	24.5	.	68.1	68.1
M 35	1	2	0	23	13	11	1	6	26	4.186	2.30364	.	.	6	26	.	.	13	.	13	28.2	.	28.2	67.6	.	67.6
M 35	1	2	0	23	13	12	1	6.5	24	3.864	2.07046	.	.	6.5	24	.	.	12.4	.	12.4	28.7	.	28.7	73.5	.	73.5
M 35	1	2	0	23	13	13	1	6.1	25	4.025	2.20287	.	.	6.1	25	.	.	12	.	12	26.2	.	26.2	.	.	.
.	.	.	.	.	.	.	.	.	.	.	.	.	.	.	.	.	.	.	.	.	.	.	.	.	.	.
M 36	1	2	0	23	12	1	2	.	.	.	.	5.8	13	5.8	13	2.093	1.16491	.	12.3	12.3	.	31.4	31.4	.	.	.
M 36	1	2	0	23	12	2	2	.	.	.	.	5.9	12	5.9	12	1.932	1.06919	.	12.3	12.3	.	32	32	.	71.5	71.5
M 36	1	2	0	23	12	3	2	.	.	.	.	5.7	12	5.7	12	1.932	1.08156	.	12.5	12.5	.	30.7	30.7	.	70.2	70.2
M 36	1	2	0	23	12	4	2	.	.	.	.	5.9	13	5.9	13	2.093	1.15829	.	12.5	12.5	.	30.9	30.9	.	72.1	72.1
M 36	1	2	0	23	12	5	2	.	.	.	.	5.8	12	5.8	12	1.932	1.0753	.	12.2	12.2	.	31	31	.	71.9	71.9
M 36	1	2	0	23	12	6	2	.	.	.	.	5.9	12	5.9	12	1.932	1.06919	.	mangler	mangler	.	.		.	.	.
M 36	1	2	0	23	12	7	1	6.3	24	3.864	2.09214	.	.	6.3	24	.	.	mangler	.	mangler	.	.		.	.	.
M 36	1	2	0	23	12	8	1	6.3	24	3.864	2.09214	.	.	6.3	24	.	.	12.1	.	12.1	mangler	.	mangler	.	.	.
M 36	1	2	0	23	12	9	1	6.2	25	4.025	2.19096	.	.	6.2	25	.	.	11.9	.	11.9	31.3	.	31.3	78.7	.	78.7
M 36	1	2	0	23	12	10	1	6.2	25	4.025	2.19096	.	.	6.2	25	.	.	12.4	.	12.4	33.6	.	33.6	73.5	.	73.5
M 36	1	2	0	23	12	11	1	5.9	25	4.025	2.22749	.	.	5.9	25	.	.	13.5	.	13.5	31.8	.	31.8	77.7	.	77.7
M 36	1	2	0	23	12	12	1	6.2	25	4.025	2.19096	.	.	6.2	25	.	.	12.8	.	12.8	31.6	.	31.6	.	.	.
.	.	.	.	.	.	.	.	.	.	.	.	.	.	.	.	.	.	.	.	.	.	.	.	.	.	.
M 37	1	2	0	23	15	1	2	.	.	.	.	5.7	13	5.7	13	2.093	1.17169	.	12	12	.	23.3	23.3	.	.	.
M 37	1	2	0	23	15	2	2	.	.	.	.	5.7	14	5.7	14	2.254	1.26181	.	10.4	10.4	.	22.2	22.2	.	59.4	59.4
M 37	1	2	0	23	15	3	2	.	.	.	.	5.3	14	5.3	14	2.254	1.29279	.	11.8	11.8	.	23	23	.	55.4	55.4
M 37	1	2	0	23	15	4	2	.	.	.	.	6	14	6	14	2.254	1.24042	.	10.1	10.1	.	22.6	22.6	.	58.9	58.9
M 37	1	2	0	23	15	5	2	.	.	.	.	5.8	14	5.8	14	2.254	1.25452	.	10.7	10.7	.	23.8	23.8	.	57.3	57.3
M 37	1	2	0	23	15	6	2	.	.	.	.	5.6	13	5.6	13	2.093	1.17862	.	10.3	10.3	.	27	27	.	55.2	55.2
M 37	1	2	0	23	15	7	2	.	.	.	.	5.7	13	5.7	13	2.093	1.17169	.	10.1	10.1	.	23.6	23.6	.	55.1	55.1
M 37	1	2	0	23	15	8	2	.	.	.	.	5.6	13	5.6	13	2.093	1.17862	.	10.1	10.1	.	17.7	17.7	.	40.8	40.8
M 37	1	2	0	23	15	9	1	5.4	25	4.025	2.29422	.	.	5.4	25	.	.	11.3	.	11.3	23.1	.	23.1	59.6	.	59.6
M 37	1	2	0	23	15	10	1	5.5	25	4.025	2.28023	.	.	5.5	25	.	.	11.4	.	11.4	22.3	.	22.3	57.4	.	57.4
M 37	1	2	0	23	15	11	1	6.5	25	4.025	2.15672	.	.	6.5	25	.	.	10.6	.	10.6	23.4	.	23.4	56.8	.	56.8
M 37	1	2	0	23	15	12	1	5.8	24	3.864	2.15061	.	.	5.8	24	.	.	11.2	.	11.2	23.4	.	23.4	57.2	.	57.2
M 37	1	2	0	23	15	13	1	5.7	25	4.025	2.25324	.	.	5.7	25	.	.	10	.	10	25.2	.	25.2	56.2	.	56.2
M 37	1	2	0	23	15	14	1	6	24	3.864	2.12644	.	.	6	24	.	.	10.3	.	10.3	25.3	.	25.3	58.2	.	58.2
M 37	1	2	0	23	15	15	1	6.3	25	4.025	2.17931	.	.	6.3	25	.	.	10.6	.	10.6	22.8	.	22.8	.	.	.
.	.	.	.	.	.	.	.	.	.	.	.	.	.	.	.	.	.	.	.	.	.	.	.	.	.	.
M 38	1	2	0	23	8	1	2	.	.	.	.	6.1	13	6.1	13	2.093	1.14549	.	13.9	13.9	.	30.9	30.9	.	76.1	76.1
M 38	1	2	0	23	8	2	2	.	.	.	.	6.6	13	6.6	13	2.093	1.1158	.	13.7	13.7	.	31.8	31.8	.	74.2	74.2
M 38	1	2	0	23	8	3	2	.	.	.	.	6.3	13	6.3	13	2.093	1.13324	.	13.3	13.3	.	31.3	31.3	.	.
M 38	1	2	0	23	8	4	1	6.8	25	4.025	2.12453	.	.	6.8	25	.	.	14.1	.	14.1	32.2	.	32.2	72.8	.	72.8
M 38	1	2	0	23	8	5	1	6.8	25	4.025	2.12453	.	.	6.8	25	.	.	9	.	9	30.9	.	30.9	77.3	.	77.3
M 38	1	2	0	23	8	6	1	6.3	25	4.025	2.17931	.	.	6.3	25	.	.	15.1	.	15.1	33.2	.	33.2	75.8	.	75.8
M 38	1	2	0	23	8	7	1	6.8	23	3.703	1.95457	.	.	6.8	23	.	.	14.6	.	14.6	23.2	.	23.2	79.2	.	79.2
M 38	1	2	0	23	8	8	1	5.5	23	3.703	2.09781	.	.	5.5	23	.	.	13.1	.	13.1	33.7	.	33.7	.	.	.
.	.	.	.	.	.	.	.	.	.	.	.	.	.	.	.	.	.	.	.	.	.	.	.	.	.	.
M 39	1	2	0	23	12	1	2	.	.	.	.	6	13	6	13	2.093	1.15182	.	11.1	11.1	.	26.3	26.3	.	.	.
M 39	1	2	0	23	12	2	2	.	.	.	.	5.8	13	5.8	13	2.093	1.16491	.	10.7	10.7	.	23.5	23.5	.	60	60
M 39	1	2	0	23	12	3	2	.	.	.	.	5.8	13	5.8	13	2.093	1.16491	.	10.8	10.8	.	25.7	25.7	.	58.1	58.1
M 39	1	2	0	23	12	4	2	.	.	.	.	6	12	6	12	1.932	1.06322	.	11.7	11.7	.	25.5	25.5	.	57.1	57.1
M 39	1	2	0	23	12	5	2	.	.	.	.	5.7	13	5.7	13	2.093	1.17169	.	10.4	10.4	.	25.4	25.4	.	59.2	59.2
M 39	1	2	0	23	12	6	2	.	.	.	.	5.5	12	5.5	12	1.932	1.09451	.	11	11	.	25.3	25.3	.	57.1	57.1
M 39	1	2	0	23	12	7	1	6.1	23	3.703	2.02664	.	.	6.1	23	.	.	10.8	.	10.8	25.9	.	25.9	61.7	.	61.7
M 39	1	2	0	23	12	8	1	5.9	24	3.864	2.13839	.	.	5.9	24	.	.	11.2	.	11.2	25.8	.	25.8	63.7	.	63.7
M 39	1	2	0	23	12	9	1	6.7	24	3.864	2.04965	.	.	6.7	24	.	.	12.3	.	12.3	27.1	.	27.1	59.9	.	59.9
M 39	1	2	0	23	12	10	1	6.3	23	3.703	2.00497	.	.	6.3	23	.	.	11.5	.	11.5	25.8	.	25.8	64.1	.	64.1
M 39	1	2	0	23	12	11	1	6.5	24	3.864	2.07046	.	.	6.5	24	.	.	11.7	.	11.7	25.1	.	25.1	63	.	63
M 39	1	2	0	23	12	12	1	6.4	24	3.864	2.08118	.	.	6.4	24	.	.	11.9	.	11.9	26.4	.	26.4	.	.	.
.	.	.	.	.	.	.	.	.	.	.	.	.	.	.	.	.	.	.	.	.	.	.	.	.	.	.
M 40	1	2	0	23	9	1	2	.	.	.	.	6.7	14	6.7	14	2.254	1.19563	.	13.9	13.9	.	27.9	27.9	.	.	.
M 40	1	2	0	23	9	2	2	.	.	.	.	6.6	14	6.6	14	2.254	1.20164	.	13	13	.	29.3	29.3	.	75.1	75.1
M 40	1	2	0	23	9	3	2	.	.	.	.	6.4	13	6.4	13	2.093	1.12731	.	13.6	13.6	.	29.1	29.1	.	68.3	68.3
M 40	1	2	0	23	9	4	2	.	.	.	.	6.7	14	6.7	14	2.254	1.19563	.	14	14	.	30.4	30.4	.	65.5	65.5
M 40	1	2	0	23	9	5	2	.	.	.	.	6.7	13	6.7	13	2.093	1.11022	.	14.4	14.4	.	26.6	26.6	.	69.2	69.2
M 40	1	2	0	23	9	6	1	7.1	26	4.186	2.17794	.	.	7.1	26	.	.	14.4	.	14.4	30.5	.	30.5	72.1	.	72.1
M 40	1	2	0	23	9	7	1	7	25	4.025	2.1041	.	.	7	25	.	.	14.6	.	14.6	30.1	.	30.1	72.7	.	72.7
M 40	1	2	0	23	9	8	1	7	26	4.186	2.18826	.	.	7	26	.	.	14.5	.	14.5	30.5	.	30.5	72.2	.	72.2
M 40	1	2	0	23	9	9	1	6.9	26	4.186	2.19879	.	.	6.9	26	.	.	14.5	.	14.5	31	.	31	.	.	.
.	.	.	.	.	.	.	.	.	.	.	.	.	.	.	.	.	.	.	.	.	.	.	.	.	.	.
M 41	1	2	0	23	12	1	2	.	.	.	.	5.4	14	5.4	14	2.254	1.28476		11.5	11.5	.	25.9	25.9	.	.	.
M 41	1	2	0	23	12	2	2	.	.	.	.	6.3	14	6.3	14	2.254	1.22041		12.6	12.6	.	26.3	26.3	.	55.5	55.5
M 41	1	2	0	23	12	3	2	.	.	.	.	6.4	13	6.4	13	2.093	1.12731		11.2	11.2	.	24.7	24.7	.	63.2	63.2
M 41	1	2	0	23	12	4	2	.	.	.	.	5.5	14	5.5	14	2.254	1.27693		11.7	11.7	.	25.2	25.2	.	66.1	66.1
M 41	1	2	0	23	12	5	2	.	.	.	.	6.1	13	6.1	13	2.093	1.14549		11.9	11.9	.	26.9	26.9	.	63.1	63.1
M 41	1	2	0	23	12	6	2	.	.	.	.	6.5	13	6.5	13	2.093	1.1215		11.9	11.9	.	24.3	24.3	.	58.2	58.2
M 41	1	2	0	23	12	7	2	.	.	.	.	5.9	13	5.9	13	2.093	1.15829		11.5	11.5	.	26.2	26.2	.	67.3	67.3
M 41	1	2	0	23	12	8	1	6.4	25	4.025	2.1679	.	.	6.4	25	.	.	12.4		12.4	26.9		26.9	68.7	.	68.7
M 41	1	2	0	23	12	9	1	7	25	4.025	2.1041	.	.	7	25	.	.	12.6		12.6	26.6		26.6	63.1	.	63.1
M 41	1	2	0	23	12	10	1	6.9	25	4.025	2.11422	.	.	6.9	25	.	.	11.7		11.7	27.4		27.4	67.2	.	67.2
M 41	1	2	0	23	12	11	1	6.2	24	3.864	2.10333	.	.	6.2	24	.	.	12.2		12.2	26.8		26.8	65.6	.	65.6
M 41	1	2	0	23	12	12	1	6.5	25	4.025	2.15672	.	.	6.5	25	.	.	12.2		12.2	26.7		26.7	.	.	.
.	.	.	.	.	.	.	.	.	.	.	.	.	.	.	.	.	.	.	.	.	.	.	.	.	.	.
M 42	1	2	0	23	14	1	2	.	.	.	.	5	13	5	13	2.093	1.22399	.	9.8	9.8	.	21.5	21.5	.	.	.
M 42	1	2	0	23	14	2	2	.	.	.	.	4.7	12	4.7	12	1.932	1.15339	.	9.5	9.5	.	25	25	.	68.4	68.4
M 42	1	2	0	23	14	3	2	.	.	.	.	5.8	12	5.8	12	1.932	1.0753	.	9.7	9.7	.	19.6	19.6	.	69.2	69.2
M 42	1	2	0	23	14	4	2	.	.	.	.	5.5	12	5.5	12	1.932	1.09451	.	8.3	8.3	.	21.6	21.6	.	55.9	55.9
M 42	1	2	0	23	14	5	2	.	.	.	.	5	12	5	12	1.932	1.12984	.	10	10	.	24.4	24.4	.	58.9	58.9
M 42	1	2	0	23	14	6	2	.	.	.	.	5.6	13	5.6	13	2.093	1.17862	.	8.6	8.6	.	24.2	24.2	.	57.6	57.6
M 42	1	2	0	23	14	7	2	.	.	.	.	5.5	13	5.5	13	2.093	1.18572	.	11	11	.	22.4	22.4	.	58.1	58.1
M 42	1	2	0	23	14	8	2	.	.	.	.	5.3	14	5.3	14	2.254	1.29279	.	9.6	9.6	.	20.8	20.8	.	63.1	63.1
M 42	1	2	0	23	14	9	2	.	.	.	.	4.1	12	4.1	12	1.932	1.20711	.	6.1	6.1	.	13.7	13.7	.	.	.
M 42	1	2	0	23	14	10	1	5.6	24	3.864	2.17591	.	.	5.6	24	.	.	9.5	.	9.5	20.9	.	20.9	56.1	.	56.1
M 42	1	2	0	23	14	11	1	5.3	23	3.703	2.12387	.	.	5.3	23	.	.	9.2	.	9.2	25.2	.	25.2	55.6	.	55.6
M 42	1	2	0	23	14	12	1	5.5	23	3.703	2.09781	.	.	5.5	23	.	.	9	.	9	22	.	22	64.3	.	64.3
M 42	1	2	0	23	14	13	1	5.6	23	3.703	2.08525	.	.	5.6	23	.	.	9.9	.	9.9	22.3	.	22.3	63.1	.	63.1
M 42	1	2	0	23	14	14	1	5.2	23	3.703	2.1374	.	.	5.2	23	.	.	10.2	.	10.2	24.7	.	24.7	.	.	.
.	.	.	.	.	.	.	.	.	.	.	.	.	.	.	.	.	.	.	.	.	.	.	.	.	.	.
M 43	1	2	0	23	13	1	2	.	.	.	.	4.9	12	4.9	12	1.932	1.13747	.	9.9	9.9	.	25.1	25.1	.	.	.
M 43	1	2	0	23	13	2	2	.	.	.	.	4.9	12	4.9	12	1.932	1.13747	.	9.9	9.9	.	24.3	24.3	.	55.3	55.3
M 43	1	2	0	23	13	3	2	.	.	.	.	5.2	13	5.2	13	2.093	1.2081	.	9.1	9.1	.	25.4	25.4	.	55.7	55.7
M 43	1	2	0	23	13	4	2	.	.	.	.	4.7	13	4.7	13	2.093	1.2495	.	9.6	9.6	.	22.7	22.7	.	59.2	59.2
M 43	1	2	0	23	13	5	1	5.1	23	3.703	2.15128	.	.	5.1	23	.	.	10.2	.	10.2	23.9	.	23.9	60.5	.	60.5
M 43	1	2	0	23	13	6	1	5.1	23	3.703	2.15128	.	.	5.1	23	.	.	10	.	10	25.9	.	25.9	61.9	.	61.9
M 43	1	2	0	23	13	7	1	5.1	24	3.864	2.24481	.	.	5.1	24	.	.	9.6	.	9.6	22.8	.	22.8	60.3	.	60.3
M 43	1	2	0	23	13	8	1	4.9	24	3.864	2.27495	.	.	4.9	24	.	.	10	.	10	24.3	.	24.3	60.3	.	60.3
M 43	1	2	0	23	13	9	1	5.1	22	3.542	2.05775	.	.	5.1	22	.	.	10	.	10	25.7	.	25.7	61.2	.	61.2
M 43	1	2	0	23	13	10	1	5.1	22	3.542	2.05775	.	.	5.1	22	.	.	10.2	.	10.2	25	.	25	60	.	60
M 43	1	2	0	23	13	11	1	4.9	25	4.025	2.36974	.	.	4.9	25	.	.	9.7	.	9.7	25.3	.	25.3	59.2	.	59.2
M 43	1	2	0	23	13	12	1	5.3	25	4.025	2.30856	.	.	5.3	25	.	.	10	.	10	24.4	.	24.4	59.3	.	59.3
M 43	1	2	0	23	13	13	1	5.2	24	3.864	2.23033	.	.	5.2	24	.	.	9.5	.	9.5	22.6	.	22.6	.	.	.
.	.	.	.	.	.	.	.	.	.	.	.	.	.	.	.	.	.	.	.	.	.	.	.	.	.	.
M 44	1	2	0	23	12	1	2	.	.	.	.	5.6	13	5.6	13	2.093	1.17862	.	11	11	.	26.4	26.4	.	.	.
M 44	1	2	0	23	12	2	2	.	.	.	.	6.1	12	6.1	12	1.932	1.05738	.	10.7	10.7	.	26	26	.	62.7	62.7
M 44	1	2	0	23	12	3	2	.	.	.	.	5.6	12	5.6	12	1.932	1.08796	.	11.4	11.4	.	25.3	25.3	.	60.1	60.1
M 44	1	2	0	23	12	4	2	.	.	.	.	5.7	12	5.7	12	1.932	1.08156	.	11.6	11.6	.	25	25	.	63.3	63.3
M 44	1	2	0	23	12	5	2	.	.	.	.	5.3	13	5.3	13	2.093	1.20045	.	11.1	11.1	.	24.8	24.8	.	65.1	65.1
M 44	1	2	0	23	12	6	2	.	.	.	.	5.2	13	5.2	13	2.093	1.2081	.	11.3	11.3	.	24.9	24.9	.	66.1	66.1
M 44	1	2	0	23	12	7	1	5.7	24	3.864	2.16311	.	.	5.7	24	.	.	12.2	.	12.2	26.7	.	26.7	68.1	.	68.1
M 44	1	2	0	23	12	8	1	5.8	24	3.864	2.15061	.	.	5.8	24	.	.	11.7	.	11.7	26.3	.	26.3	65.5	.	65.5
M 44	1	2	0	23	12	9	1	6.3	25	4.025	2.17931	.	.	6.3	25	.	.	12.1	.	12.1	26	.	26	68.7	.	68.7
M 44	1	2	0	23	12	10	1	6	23	3.703	2.03784	.	.	6	23	.	.	11.6	.	11.6	26	.	26	70.3	.	70.3
M 44	1	2	0	23	12	11	1	6.4	24	3.864	2.08118	.	.	6.4	24	.	.	11.5	.	11.5	26.4	.	26.4	66.2	.	66.2
M 44	1	2	0	23	12	12	1	6.2	24	3.864	2.10333	.	.	6.2	24	.	.	11.3	.	11.3	26.3	.	26.3	.	.	.
.	.	.	.	.	.	.	.	.	.	.	.	.	.	.	.	.	.	.	.	.	.	.	.	.	.	.
M 45	1	2	0	23	5	1	2	.	.	.	.	6.7	13	6.7	13	2.093	1.11022	.	14.2	14.2	.	37.3	37.3	.	80.9	80.9
M 45	1	2	0	23	5	2	2	.	.	.	.	6.9	13	6.9	13	2.093	1.09939	.	15.8	15.8	.	36.9	36.9	.	78	78
M 45	1	2	0	23	5	3	2	.	.	.	.	7	13	7	13	2.093	1.09413	.	16.1	16.1	.	35.1	35.1	.	77.3	77.3
M 45	1	2	0	23	5	4	2	.	.	.	.	6.6	12	6.6	12	1.932	1.02997	.	15.7	15.7	.	37.5	37.5	.	.	.
M 45	1	2	0	23	5	5	1	7	24	3.864	2.01994			7	24	.	.	15.9		15.9	37.6		37.6	.	.	.
.	.	.	.	.	.	.	.	.	.	.	.	.	.	.	.	.	.	.	.	.	.	.	.	.	.	.
M 46	1	2	0	23	9	1	2	.	.	.	.	6	13	6	13	2.093	1.15182	.	13.9	13.9	.	36	36	.	.	.
M 46	1	2	0	23	9	2	2	.	.	.	.	6.6	13	6.6	13	2.093	1.1158	.	15	15	.	34.3	34.3	.	83.4	83.4
M 46	1	2	0	23	9	3	2	.	.	.	.	5.7	12	5.7	12	1.932	1.08156	.	16.7	16.7	.	32.2	32.2	.	80.1	80.1
M 46	1	2	0	23	9	4	2	.	.	.	.	6.7	13	6.7	13	2.093	1.11022	.	16.5	16.5	.	32.8	32.8	.	81.4	81.4
M 46	1	2	0	23	9	5	2	.	.	.	.	6.2	12	6.2	12	1.932	1.05166	.	14.5	14.5	.	36.1	36.1	.	76.9	76.9
M 46	1	2	0	23	9	6	1	6.6	24	3.864	2.05995	.	.	6.6	24	.	.	15	.	15	33.9	.	33.9	.	.	.
M 46	1	2	0	23	9	7	1	6.4	25	4.025	2.1679	.	.	6.4	25	.	.	13.7	.	13.7	33.5	.	33.5	80.1	.	80.1
M 46	1	2	0	23	9	8	1	5.9	25	4.025	2.22749	.	.	5.9	25	.	.	16.3	.	16.3	35.7	.	35.7	85.1	.	85.1
M 46	1	2	0	23	9	9	1	6.2	25	4.025	2.19096	.	.	6.2	25	.	.	15	.	15	32.5	.	32.5	89.5	.	89.5
.	.	.	.	.	.	.	.	.	.	.	.	.	.	.	.	.	.	.	.	.	.	.	.	.	.	.
M 47	2	2	40	23	12	1	2	.	.	.	.	5.1	11	5.1	11	1.771	1.02887	.	9.4	9.4	.	23	23	.	.	.
M 47	2	2	40	23	12	2	2	.	.	.	.	5.3	11	5.3	11	1.771	1.01577	.	9	9	.	22.6	22.6	.	53.2	53.2
M 47	2	2	40	23	12	3	2	.	.	.	.	4.9	11	4.9	11	1.771	1.04269	.	8.4	8.4	.	22.8	22.8	.	57.9	57.9
M 47	2	2	40	23	12	4	2	.	.	.	.	5.2	12	5.2	12	1.932	1.11517	.	9	9	.	22.8	22.8	.	58.1	58.1
M 47	2	2	40	23	12	5	2	.	.	.	.	5.4	12	5.4	12	1.932	1.10122	.	8.8	8.8	.	21.9	21.9	.	57.2	57.2
M 47	2	2	40	23	12	6	2	.	.	.	.	5.3	11	5.3	11	1.771	1.01577	.	9	9	.	23	23	.	56.2	56.2
M 47	2	2	40	23	12	7	2	.	.	.	.	5.6	12	5.6	12	1.932	1.08796	.	8.4	8.4	.	21.8	21.8	.	57.2	57.2
M 47	2	2	40	23	12	8	2	.	.	.	.	5.3	12	5.3	12	1.932	1.10811	.	8.7	8.7	.	21.9	21.9	.	57.2	57.2
M 47	2	2	40	23	12	9	1	5.3	22	3.542	2.03153	.	.	5.3	22	.	.	8.9	.	8.9	23	.	23	54.2	.	54.2
M 47	2	2	40	23	12	10	1	5.2	21	3.381	1.95154	.	.	5.2	21	.	.	8.8	.	8.8	21.6	.	21.6	58.8	.	58.8
M 47	2	2	40	23	12	11	1	5.5	22	3.542	2.0066	.	.	5.5	22	.	.	8.6	.	8.6	22.2	.	22.2	59.2	.	59.2
M 47	2	2	40	23	12	12	1	5.7	22	3.542	1.98285	.	.	5.7	22	.	.	9.1	.	9.1	22.8	.	22.8	.	.	.
.	.	.	.	.	.	.	.	.	.	.	.	.	.	.	.	.	.	.	.	.	.	.	.	.	.	.
M 48	2	2	40	.	.	.	.	.	.	.	.	.	.	.	.	.	.	.	.	.	.	.	.	.	.	.
.	.	.	.	.	.	.	.	.	.	.	.	.	.	.	.	.	.	.	.	.	.	.	.	.	.	.
M 49	2	2	40	23	11	1	2	.	.	.	.	6.6	12	6.6	12	1.932	1.02997	.	11.8	11.8	.	23.5	23.5	.	.	.
M 49	2	2	40	23	11	2	2	.	.	.	.	6.1	12	6.1	12	1.932	1.05738	.	11.6	11.6	.	24	24	.	63.2	63.2
M 49	2	2	40	23	11	3	2	.	.	.	.	6.5	12	6.5	12	1.932	1.03523	.	11.3	11.3	.	24.1	24.1	.	62.9	62.9
M 49	2	2	40	23	11	4	2	.	.	.	.	6.4	12	6.4	12	1.932	1.04059	.	12.5	12.5	.	22.6	22.6	.	60.1	60.1
M 49	2	2	40	23	11	5	2	.	.	.	.	6	12	6	12	1.932	1.06322	.	11.7	11.7	.	24.9	24.9	.	61.4	61.4
M 49	2	2	40	23	11	6	2	.	.	.	.	6.1	12	6.1	12	1.932	1.05738	.	12.1	12.1	.	23.8	23.8	.	63	63
M 49	2	2	40	23	11	7	1	6.6	22	3.542	1.88828	.	.	6.6	22	.	.	12.6	.	12.6	24.9	.	24.9	63.4	.	63.4
M 49	2	2	40	23	11	8	1	6.5	22	3.542	1.89792	.	.	6.5	22	.	.	12.7	.	12.7	25.7	.	25.7	64.8	.	64.8
M 49	2	2	40	23	11	9	1	7.2	22	3.542	1.8343	.	.	7.2	22	.	.	12	.	12	25.7	.	25.7	68.4	.	68.4
M 49	2	2	40	23	11	10	1	6.7	22	3.542	1.87884	.	.	6.7	22	.	.	12.1	.	12.1	25.3	.	25.3	67.4	.	67.4
M 49	2	2	40	23	11	11	1	6.6	22	3.542	1.88828	.	.	6.6	22	.	.	11.5	.	11.5	25	.	25	.	.	.
.	.	.	.	.	.	.	.	.	.	.	.	.	.	.	.	.	.	.	.	.	.	.	.	.	.	.
M 50	2	2	40	23	10	1	2	.	.	.	.	6.5	12	6.5	12	1.932	1.03523	.	13.7	13.7	.	28.7	28.7	.	.	.
M 50	2	2	40	23	10	2	2	.	.	.	.	6.4	12	6.4	12	1.932	1.04059	.	12.7	12.7	.	27.9	27.9	.	63.3	63.3
M 50	2	2	40	23	10	3	2	.	.	.	.	6.8	12	6.8	12	1.932	1.01977	.	13.2	13.2	.	28.4	28.4	.	68.2	68.2
M 50	2	2	40	23	10	4	2	.	.	.	.	6.2	12	6.2	12	1.932	1.05166	.	12.8	12.8	.	28.3	28.3	.	69.1	69.1
M 50	2	2	40	23	10	5	2	.	.	.	.	6.2	13	6.2	13	2.093	1.1393	.	13	13	.	29.4	29.4	.	69.5	69.5
M 50	2	2	40	23	10	6	2		.	.	.	6.4	12	6.4	12	1.932	1.04059	.	13.2	13.2	.	28.8	28.8	.	67.5	67.5
M 50	2	2	40	23	10	7	1	6.4	22	3.542	1.90775	.	.	6.4	22	.	.	13	.	13	28.5	.	28.5	67.4	.	67.4
M 50	2	2	40	23	10	8	1	6.3	22	3.542	1.91779	.	.	6.3	22	.	.	13.1	.	13.1	29.5	.	29.5	72.4	.	72.4
M 50	2	2	40	23	10	9	1	6.8	22	3.542	1.86959	.	.	6.8	22	.	.	14.3	.	14.3	29.3	.	29.3	68.6	.	68.6
M 50	2	2	40	23	10	10	1	7	22	3.542	1.85161	.	.	7	22	.	.	14	.	14	28.9	.	28.9	.	.	.
.	.	.	.	.	.	.	.	.	.	.	.	.	.	.	.	.	.	.	.	.	.	.	.	.	.	.
M 51	2	2	40	23	6	1	2	.	.	.	.	6.6	11	6.6	11	1.771	0.944142	.	14.6	14.6	.	34.5	34.5	.	.	.
M 51	2	2	40	23	6	2	2	.	.	.	.	6.8	11	6.8	11	1.771	0.934793	.	15.3	15.3	.	35.7	35.7	.	81.8	81.8
M 51	2	2	40	23	6	3	2	.	.	.	.	6.7	12	6.7	12	1.932	1.02482	.	15.1	15.1	.	34.9	34.9	.	87.1	87.1
M 51	2	2	40	23	6	4	2	.	.	.	.	6.5	12	6.5	12	1.932	1.03523	.	14.5	14.5	.	35.6	35.6	.	75.8	75.8
M 51	2	2	40	23	6	5	1	6.9	21	3.381	1.77594	.	.	6.9	21	.	.	15.9	.	15.9	36	.	36	86.6	.	86.6
M 51	2	2	40	23	6	6	1	7.2	21	3.381	1.75093	.	.	7.2	21	.	.	15.8	.	15.8	36.9	.	36.9	83.5	.	83.5
.	.	.	.	.	.	.	.	.	.	.	.	.	.	.	.	.	.	.	.	.	.	.	.	.	.	.
M 52	2	2	40	23	15	1	2	.	.	.	.	5.5	11	5.5	11	1.771	1.0033	.	9	9	.	24	24	.	.	.
M 52	2	2	40	23	15	2	2	.	.	.	.	5.3	11	5.3	11	1.771	1.01577	.	8	8	.	23.2	23.2	.	60.3	60.3
M 52	2	2	40	23	15	3	2	.	.	.	.	5.6	11	5.6	11	1.771	0.997292	.	8.2	8.2	.	23.7	23.7	.	59.9	59.9
M 52	2	2	40	23	15	4	2	.	.	.	.	5.6	10	5.6	10	1.61	0.90663	.	8.3	8.3	.	21.3	21.3	.	60	60
M 52	2	2	40	23	15	5	2	.	.	.	.	5.3	12	5.3	12	1.932	1.10811	.	8.4	8.4	.	22.8	22.8	.	58	58
M 52	2	2	40	23	15	6	2	.	.	.	.	5.2	11	5.2	11	1.771	1.02224	.	8.3	8.3	.	22.6	22.6	.	58.1	58.1
M 52	2	2	40	23	15	7	2	.	.	.	.	5.7	11	5.7	11	1.771	0.991426	.	7.9	7.9	.	22	22	.	61	61
M 52	2	2	40	23	15	8	2	.	.	.	.	5.8	11	5.8	11	1.771	0.985695	.	8.5	8.5	.	22.2	22.2	.	61.8	61.8
M 52	2	2	40	23	15	9	2	.	.	.	.	5.7	12	5.7	12	1.932	1.08156	.	8.3	8.3	.	22.6	22.6	.	61.2	61.2
M 52	2	2	40	23	15	10	2	.	.	.	.	5.6	11	5.6	11	1.771	0.997292	.	8.9	8.9	.	21.8	21.8	.	60.9	60.9
M 52	2	2	40	23	15	11	2	.	.	.	.	5.2	11	5.2	11	1.771	1.02224	.	9.4	9.4	.	23.1	23.1	.	59.9	59.9
M 52	2	2	40	23	15	12	2	.	.	.	.	5	12	5	12	1.932	1.12984	.	mangler	mangler	.	.		.	.	.
M 52	2	2	40	23	15	13	1	6.1	22	3.542	1.93853	.	.	6.1	22	.	.	9.2		9.2	24.9	.	24.9	.	.	.
M 52	2	2	40	23	15	14	1	5.2	22	3.542	2.04447	.	.	5.2	22	.	.	6.7		6.7	24.4	.	24.4	69.2	.	69.2
M 52	2	2	40	23	15	15	1	5.8	21	3.381	1.88178	.	.	5.8	21	.	.	9.3		9.3	19.7	.	19.7	61.2	.	61.2
.	.	.	.	.	.	.	.	.	.	.	.	.	.	.	.	.	.	.	.	.	.	.	.	.	.	.
M 53	2	2	40	23	12	1	2	.	.	.	.	6	10	6	10	1.61	0.886017	.	10.3	10.3	.	22.4	22.4	.	.	.
M 53	2	2	40	23	12	2	2	.	.	.	.	5.4	11	5.4	11	1.771	1.00946	.	11.2	11.2	.	22.2	22.2	.	61.8	61.8
M 53	2	2	40	23	12	3	2	.	.	.	.	5.8	11	5.8	11	1.771	0.985695	.	10.3	10.3	.	22.6	22.6	.	54.9	54.9
M 53	2	2	40	23	12	4	2	.	.	.	.	5.2	11	5.2	11	1.771	1.02224	.	9.5	9.5	.	23.4	23.4	.	58.2	58.2
M 53	2	2	40	23	12	5	2	.	.	.	.	5.4	11	5.4	11	1.771	1.00946	.	10.2	10.2	.	23.1	23.1	.	58.9	58.9
M 53	2	2	40	23	12	6	2	.	.	.	.	5.3	12	5.3	12	1.932	1.10811	.	9.9	9.9	.	21.9	21.9	.	55.1	55.1
M 53	2	2	40	23	12	7	1	6.5	20	3.22	1.72538	.	.	6.5	20	.	.	10.5	.	10.5	23.6	.	23.6	60.3	.	60.3
M 53	2	2	40	23	12	8	1	5.8	22	3.542	1.97139	.	.	5.8	22	.	.	10.3	.	10.3	24	.	24	60.2	.	60.2
M 53	2	2	40	23	12	9	1	5.9	22	3.542	1.96019	.	.	5.9	22	.	.	10.5	.	10.5	22.5	.	22.5	57.9	.	57.9
M 53	2	2	40	23	12	10	1	6.3	21	3.381	1.83062	.	.	6.3	21	.	.	10.6	.	10.6	23.6	.	23.6	57	.	57
M 53	2	2	40	23	12	11	1	5.8	22	3.542	1.97139	.	.	5.8	22	.	.	10.5	.	10.5	23.2	.	23.2	59.3	.	59.3
M 53	2	2	40	23	12	12	1	6	21	3.381	1.86064	.	.	6	21	.	.	10.3	.	10.3	23.3	.	23.3	.	.	.
.	.	.	.	.	.	.	.	.	.	.	.	.	.	.	.	.	.	.	.	.	.	.	.	.	.	.
M 54	2	2	40	23	5	1	2	.	.	.	.	7.6	12	7.6	12	1.932	0.982658	.	17.5	17.5	.	38.5	38.5	.	.	.
M 54	2	2	40	23	5	2	2	.	.	.	.	7	12	7	12	1.932	1.00997	.	16.6	16.6	.	34.3	34.3	.	86.6	86.6
M 54	2	2	40	23	5	3	2	.	.	.	.	7	13	7	13	2.093	1.09413	.	16.6	16.6	.	40	40	.	86.2	86.2
M 54	2	2	40	23	5	4	2	.	.	.	.	6.2	12	6.2	12	1.932	1.05166	.	14.5	14.5	.	38.3	38.3	.	85.9	85.9
M 54	2	2	40	23	5	5	1	7.5	24	3.864	1.97401	.	.	7.5	24	.	.	17.4	.	17.4	40.6		40.6	98.6	.	98.6
.	.	.	.	.	.	.	.	.	.	.	.	.	.	.	.	.	.	.	.	.	.	.	.	.	.	.
M 55	2	2	40	23	13	1	2	.	.	.	.	6.1	11	6.1	11	1.771	0.969264	.	12.7	12.7	.	26.7	26.7	.	.	.
M 55	2	2	40	23	13	2	2	.	.	.	.	5.8	11	5.8	11	1.771	0.985695	.	12.1	12.1	.	26.4	26.4	.	57.4	57.4
M 55	2	2	40	23	13	3	2	.	.	.	.	5.6	11	5.6	11	1.771	0.997292	.	11.8	11.8	.	27.9	27.9	.	61	61
M 55	2	2	40	23	13	4	2	.	.	.	.	5.8	11	5.8	11	1.771	0.985695	.	12.3	12.3	.	27	27	.	64.3	64.3
M 55	2	2	40	23	13	5	2	.	.	.	.	5.9	11	5.9	11	1.771	0.980094	.	12.8	12.8	.	26.9	26.9	.	61.2	61.2
M 55	2	2	40	23	13	6	2	.	.	.	.	5.5	12	5.5	12	1.932	1.09451	.	12.2	12.2	.	26.4	26.4	.	65.2	65.2
M 55	2	2	40	23	13	7	1	6.4	22	3.542	1.90775	.	.	6.4	22	.	.	12.9	.	12.9	27.3	.	27.3	68.6	.	68.6
M 55	2	2	40	23	13	8	1	5.3	20	3.22	1.84685	.	.	5.3	20	.	.	13.3	.	13.3	30.1	.	30.1	62.2	.	62.2
M 55	2	2	40	23	13	9	1	6	22	3.542	1.94924	.	.	6	22	.	.	12.1	.	12.1	28.1	.	28.1	60.4	.	60.4
M 55	2	2	40	23	13	10	1	6.3	21	3.381	1.83062	.	.	6.3	21	.	.	13.1	.	13.1	30.1	.	30.1	65.5	.	65.5
M 55	2	2	40	23	13	11	1	6.1	22	3.542	1.93853	.	.	6.1	22	.	.	13.1	.	13.1	28.4	.	28.4	66.7	.	66.7
M 55	2	2	40	23	13	12	1	6.2	21	3.381	1.84041	.	.	6.2	21	.	.	12.2	.	12.2	29.4	.	29.4	63.8	.	63.8
M 55	2	2	40	23	13	13	1	6.4	21	3.381	1.82104	.	.	6.4	21	.	.	13.2	.	13.2	27.3	.	27.3	.	.	.
.	.	.	.	.	.	.	.	.	.	.	.	.	.	.	.	.	.	.	.	.	.	.	.	.	.	.
M 56	2	2	40	23	13	1	2	.	.	.	.	6	12	6	12	1.932	1.06322	.	10.2	10.2	.	22	22	.	.	.
M 56	2	2	40	23	13	2	2	.	.	.	.	5.5	11	5.5	11	1.771	1.0033	.	9.9	9.9	.	22.9	22.9	.	54.2	54.2
M 56	2	2	40	23	13	3	2	.	.	.	.	5.5	12	5.5	12	1.932	1.09451	.	10.5	10.5	.	23.7	23.7	.	55.9	55.9
M 56	2	2	40	23	13	4	2	.	.	.	.	6.3	11	6.3	11	1.771	0.958896	.	9.9	9.9	.	22	22	.	58.1	58.1
M 56	2	2	40	23	13	5	2	.	.	.	.	6	11	6	11	1.771	0.974619	.	10.2	10.2	.	21.8	21.8	.	57.3	57.3
M 56	2	2	40	23	13	6	2	.	.	.	.	6	12	6	12	1.932	1.06322	.	10.4	10.4	.	23	23	.	56.3	56.3
M 56	2	2	40	23	13	7	2	.	.	.	.	5.5	12	5.5	12	1.932	1.09451	.	10.7	10.7	.	21.8	21.8	.	52.4	52.4
M 56	2	2	40	23	13	8	1	5.6	21	3.381	1.90392	.	.	5.6	21	.	.	10.2	.	10.2	22.5	.	22.5	58.2	.	58.2
M 56	2	2	40	23	13	9	1	6.1	22	3.542	1.93853	.	.	6.1	22	.	.	10.5	.	10.5	23.6	.	23.6	56.2	.	56.2
M 56	2	2	40	23	13	10	1	5.9	22	3.542	1.96019	.	.	5.9	22	.	.	9.5	.	9.5	22.1	.	22.1	55	.	55
M 56	2	2	40	23	13	11	1	5.5	21	3.381	1.91539	.	.	5.5	21	.	.	10.2	.	10.2	24	.	24	58.2	.	58.2
M 56	2	2	40	23	13	12	1	5.9	21	3.381	1.87109	.	.	5.9	21	.	.	9.9	.	9.9	22.5	.	22.5	55.4	.	55.4
M 56	2	2	40	23	13	13	1	6	21	3.381	1.86064	.	.	6	21	.	.	9.7	.	9.7	22.7	.	22.7	.	.	.
.	.	.	.	.	.	.	.	.	.	.	.	.	.	.	.	.	.	.	.	.	.	.	.	.	.	.
M 57	3	2	60	23	8	1	2	.	.	.	.	7.3	13	7.3	13	2.093	1.07893	.	13.9	13.9		30.9	30.9	.	.	.
M 57	3	2	60	23	8	2	2	.	.	.	.	6.6	13	6.6	13	2.093	1.1158	.	14.4	14.4		31.8	31.8	.	75	75
M 57	3	2	60	23	8	3	2	.	.	.	.	7	12	7	12	1.932	1.00997	.	14.6	14.6		32.7	32.7	.	69.1	69.1
M 57	3	2	60	23	8	4	2	.	.	.	.	6.4	12	6.4	12	1.932	1.04059	.	14.8	14.8		33.7	33.7	.	77.3	77.3
M 57	3	2	60	23	8	5	2	.	.	.	.	7.4	14	7.4	14	2.254	1.15667	.	14.4	14.4		32.5	32.5	.	75.3	75.3
M 57	3	2	60	23	8	6	2	.	.	.	.	7.1	12	7.1	12	1.932	1.0052	.	14.8	14.8		32.2	32.2	.	74.2	74.2
M 57	3	2	60	23	8	7	1	7	24	3.864	2.01994	.	.	7	24	.	.	14.3		14.3	31.6		31.6	72.7	.	72.7
M 57	3	2	60	23	8	8	1	7.3	24	3.864	1.99188	.	.	7.3	24	.	.	14.8		14.8	32.9		32.9	76	.	76
.	.	.	.	.	.	.	.	.	.	.	.	.	.	.	.	.	.	.	.	.	.	.	.	.	.	.
M 58	3	2	60	.	.	.	.	.	.	.	.	.	.	.	.	.	.	.	.	.	.	.	.	.	.	.
.	.	.	.	.	.	.	.	.	.	.	.	.	.	.	.	.	.	.	.	.	.	.	.	.	.	.
M 59	3	2	60	23	11	1	2	.	.	.	.	5.9	12	5.9	12	1.932	1.06919	.	11.1	11.1	.	24.8	24.8	.	.	.
M 59	3	2	60	23	11	2	2	.	.	.	.	5.4	12	5.4	12	1.932	1.10122	.	11.4	11.4	.	25	25	.	59.1	59.1
M 59	3	2	60	23	11	3	2	.	.	.	.	6.1	12	6.1	12	1.932	1.05738	.	11.1	11.1	.	25	25	.	60.8	60.8
M 59	3	2	60	23	11	4	2	.	.	.	.	6.2	12	6.2	12	1.932	1.05166	.	11.5	11.5	.	22.6	22.6	.	57.4	57.4
M 59	3	2	60	23	11	5	2	.	.	.	.	5.8	11	5.8	11	1.771	0.985695	.	10.7	10.7	.	23.5	23.5	.	63.2	63.2
M 59	3	2	60	23	11	6	2	.	.	.	.	6.1	12	6.1	12	1.932	1.05738	.	10.7	10.7	.	23.3	23.3	.	59.9	59.9
M 59	3	2	60	23	11	7	1	5.8	22	3.542	1.97139	.	.	5.8	22	.	.	12.1	.	12.1	25.6	.	25.6	66.6	.	66.6
M 59	3	2	60	23	11	8	1	6.7	22	3.542	1.87884	.	.	6.7	22	.	.	12.7	.	12.7	28.4	.	28.4	66.2	.	66.2
M 59	3	2	60	23	11	9	1	6.5	21	3.381	1.81165	.	.	6.5	21	.	.	11.7	.	11.7	25.8	.	25.8	66.6	.	66.6
M 59	3	2	60	23	11	10	1	6.2	21	3.381	1.84041	.	.	6.2	21	.	.	13.4	.	13.4	27.8	.	27.8	68.1	.	68.1
M 59	3	2	60	23	11	11	1	6.4	22	3.542	1.90775	.	.	6.4	22	.	.	11.8	.	11.8	26	.	26	.	.	.
.	.	.	.	.	.	.	.	.	.	.	.	.	.	.	.	.	.	.	.	.	.	.	.	.	.	.
M 60	3	2	60	23	14	1	2	.	.	.	.	5.7	12	5.7	12	1.932	1.08156	.	10.1	10.1	.	21.6	21.6	.	.	.
M 60	3	2	60	23	14	2	2	.	.	.	.	5.6	12	5.6	12	1.932	1.08796	.	9.9	9.9	.	22.2	22.2	.	57.8	57.8
M 60	3	2	60	23	14	3	2	.	.	.	.	6.1	13	6.1	13	2.093	1.14549	.	10.5	10.5	.	24.7	24.7	.	54.6	54.6
M 60	3	2	60	23	14	4	2	.	.	.	.	5.7	13	5.7	13	2.093	1.17169	.	9.9	9.9	.	21.7	21.7	.	51.2	51.2
M 60	3	2	60	23	14	5	2	.	.	.	.	5.7	12	5.7	12	1.932	1.08156	.	11.4	11.4	.	22.7	22.7	.	54.2	54.2
M 60	3	2	60	23	14	6	2	.	.	.	.	4.8	11	4.8	11	1.771	1.04988	.	10.4	10.4	.	21.3	21.3	.	54.1	54.1
M 60	3	2	60	23	14	7	1	5.9	23	3.703	2.04929	.	.	5.9	23	.	.	mangler	.	mangler	.	.		.	.	.
M 60	3	2	60	23	14	8	1	5.6	21	3.381	1.90392	.	.	5.6	21	.	.	9.9	.	9.9	22.8	.	22.8	53.3	.	53.3
M 60	3	2	60	23	14	9	1	5.6	21	3.381	1.90392	.	.	5.6	21	.	.	10.5	.	10.5	22.9	.	22.9	55.8	.	55.8
M 60	3	2	60	23	14	10	1	5.9	21	3.381	1.87109	.	.	5.9	21	.	.	9.7	.	9.7	23	.	23	53.1	.	53.1
M 60	3	2	60	23	14	11	1	6	21	3.381	1.86064	.	.	6	21	.	.	10.2	.	10.2	22.2	.	22.2	57.8	.	57.8
M 60	3	2	60	23	14	12	1	6.3	22	3.542	1.91779	.	.	6.3	22	.	.	9.7	.	9.7	22.1	.	22.1	53.4	.	53.4
M 60	3	2	60	23	14	13	1	5.4	21	3.381	1.92714	.	.	5.4	21	.	.	11.2	.	11.2	25	.	25	56.9	.	56.9
M 60	3	2	60	23	14	14	1	5.7	23	3.703	2.07298	.	.	5.7	23	.	.	10	.	10	22	.	22	.	.	.
.	.	.	.	.	.	.	.	.	.	.	.	.	.	.	.	.	.	.	.	.	.	.	.	.	.	.
M 61	3	2	60	23	4	1	2	.	.	.	.	6.4	13	6.4	13	2.093	1.12731	.	16.3	16.3	.	34.1	34.1	.	67.1	67.1
M 61	3	2	60	23	4	2	2	.	.	.	.	7.1	13	7.1	13	2.093	1.08897	.	16.1	16.1	.	35.2	35.2	.	.	.
M 61	3	2	60	23	4	3	1	6.8	23	3.703	1.95457	.	.	6.8	23	.	.	16.3	.	16.3	33.3	.	33.3	69.7	.	69.7
M 61	3	2	60	23	4	4	1	7.2	24	3.864	2.00106	.	.	7.2	24	.	.	15.3	.	15.3	34.4	.	34.4	.	.	.
.	.	.	.	.	.	.	.	.	.	.	.	.	.	.	.	.	.	.	.	.	.	.	.	.	.	.
M 62	3	2	60	23	13	1	2	.	.	.	.	4.7	12	4.7	12	1.932	1.15339	.	død	død	.	.	.	.	.	.
M 62	3	2	60	23	13	2	2	.	.	.	.	4.7	12	4.7	12	1.932	1.15339	.	død	død	.	.	.	.	.	.
M 62	3	2	60	23	13	3	2	.	.	.	.	5.1	12	5.1	12	1.932	1.12241	.	mangler	mangler	.	.	.	.	.	.
M 62	3	2	60	23	13	4	2	.	.	.	.	4.6	11	4.6	11	1.771	1.06488	.	8.8	8.8	.	29.9	29.9	.	68	68
M 62	3	2	60	23	13	5	2	.	.	.	.	4.8	11	4.8	11	1.771	1.04988	.	8.1	8.1	.	28.9	28.9	.	70.8	70.8
M 62	3	2	60	23	13	6	2	.	.	.	.	4.7	12	4.7	12	1.932	1.15339	.	8.2	8.2	.	28.1	28.1	.	.	.
M 62	3	2	60	23	13	7	1	5.2	19	3.059	1.76568	.	.	5.2	19	.	.	9	.	9	28.5	.	28.5	.	.	.
M 62	3	2	60	23	13	8	1	5	23	3.703	2.16553	.	.	5	23	.	.	mangler	.	mangler	.	.	.	.	.	.
M 62	3	2	60	23	13	9	1	5	20	3.22	1.88307	.	.	5	20	.	.	død	.	død	.	.	.	.	.	.
M 62	3	2	60	23	13	10	1	4.5	22	3.542	2.14541	.	.	4.5	22	.	.	død	.	død	.	.	.	.	.	.
M 62	3	2	60	23	13	11	1	5	21	3.381	1.97722	.	.	5	21	.	.	død	.	død	.	.	.	.	.	.
M 62	3	2	60	23	13	12	1	5.4	21	3.381	1.92714	.	.	5.4	21	.	.	død	.	død	.	.	.	.	.	.
M 62	3	2	60	23	13	13	1	4.9	22	3.542	2.08537	.	.	4.9	22	.	.	død	.	død	.	.	.	.	.	.
.	.	.	.	.	.	.	.	.	.	.	.	.	.	.	.	.	.	.	.	.	.	.	.	.	.	.
M 63	3	2	60	23	2	1	2	.	.	.	.	7.7	14	7.7	14	2.254	1.14145	.	15.3	15.3	.	34	34	.	67.3	67.3
M 63	3	2	60	23	2	2	2	.	.	.	.	7.1	14	7.1	14	2.254	1.17274	.	15.2	15.2	.	36.8	36.8	.	.	.
.	.	.	.	.	.	.	.	.	.	.	.	.	.	.	.	.	.	.	.	.	.	.	.	.	.	.
M 64	3	2	60	23	13	1	2	.	.	.	.	5.6	12	5.6	12	1.932	1.08796	.	11.6	11.6	.	24.6	24.6	.	.	.
M 64	3	2	60	23	13	2	2	.	.	.	.	6.2	12	6.2	12	1.932	1.05166	.	11.4	11.4	.	26.6	26.6	.	61.7	61.7
M 64	3	2	60	23	13	3	2	.	.	.	.	5.7	12	5.7	12	1.932	1.08156	.	11.7	11.7	.	25.4	25.4	.	63.4	63.4
M 64	3	2	60	23	13	4	2	.	.	.	.	6.1	12	6.1	12	1.932	1.05738	.	12.1	12.1	.	24.9	24.9	.	60.9	60.9
M 64	3	2	60	23	13	5	2	.	.	.	.	5.9	11	5.9	11	1.771	0.980094	.	11.7	11.7	.	26	26	.	63.4	63.4
M 64	3	2	60	23	13	6	2	.	.	.	.	6	12	6	12	1.932	1.06322	.	10.9	10.9	.	24	24	.	62.7	62.7
M 64	3	2	60	23	13	7	1	5.9	22	3.542	1.96019	.	.	5.9	22	.	.	11.6	.	11.6	26.7	.	26.7	66.9	.	66.9
M 64	3	2	60	23	13	8	1	6.4	23	3.703	1.99447	.	.	6.4	23	.	.	11.6	.	11.6	27.6	.	27.6	61.7	.	61.7
M 64	3	2	60	23	13	9	1	6	23	3.703	2.03784	.	.	6	23	.	.	11.8	.	11.8	25.8	.	25.8	63.3	.	63.3
M 64	3	2	60	23	13	10	1	6.1	22	3.542	1.93853	.	.	6.1	22	.	.	11.2	.	11.2	25.4	.	25.4	60.5	.	60.5
M 64	3	2	60	23	13	11	1	6.2	22	3.542	1.92805	.	.	6.2	22	.	.	12	.	12	26.2	.	26.2	62	.	62
M 64	3	2	60	23	13	12	1	5.9	23	3.703	2.04929	.	.	5.9	23	.	.	11.8	.	11.8	24.7	.	24.7	61	.	61
M 64	3	2	60	23	13	13	1	6.2	23	3.703	2.01569	.	.	6.2	23	.	.	10.4	.	10.4	25.2	.	25.2	.	.	.
.	.	.	.	.	.	.	.	.	.	.	.	.	.	.	.	.	.	.	.	.	.	.	.	.	.	.
M 65	3	2	60	23	12	1	2	.	.	.	.	5.3	12	5.3	12	1.932	1.10811	.	8.8	8.8	.	22.5	22.5	.	59	59
M 65	3	2	60	23	12	2	2	.	.	.	.	5.5	12	5.5	12	1.932	1.09451	.	9.2	9.2	.	21.7	21.7	.	54.9	54.9
M 65	3	2	60	23	12	3	2	.	.	.	.	5.7	11	5.7	11	1.771	0.991426	.	9.2	9.2	.	22.2	22.2	.	57	57
M 65	3	2	60	23	12	4	2	.	.	.	.	5.6	12	5.6	12	1.932	1.08796	.	9.4	9.4	.	22	22	.	55.9	55.9
M 65	3	2	60	23	12	5	2	.	.	.	.	6	12	6	12	1.932	1.06322	.	8.9	8.9	.	21.5	21.5	.	.	.
M 65	3	2	60	23	12	6	1	5.2	22	3.542	2.04447	.	.	5.2	22	.	.	9.1	.	9.1	22.5	.	22.5	55.5	.	55.5
M 65	3	2	60	23	12	7	1	5.9	23	3.703	2.04929	.	.	5.9	23	.	.	9.4	.	9.4	22.3	.	22.3	59.8	.	59.8
M 65	3	2	60	23	12	8	1	5.8	23	3.703	2.061	.	.	5.8	23	.	.	8.6	.	8.6	21.3	.	21.3	55.3	.	55.3
M 65	3	2	60	23	12	9	1	5.5	23	3.703	2.09781	.	.	5.5	23	.	.	9.4	.	9.4	21.7	.	21.7	58.1	.	58.1
M 65	3	2	60	23	12	10	1	5.9	24	3.864	2.13839	.	.	5.9	24	.	.	9.4	.	9.4	22	.	22	61	.	61
M 65	3	2	60	23	12	11	1	5.5	23	3.703	2.09781	.	.	5.5	23	.	.	8.9	.	8.9	23	.	23	61	.	61
M 65	3	2	60	23	12	12	1	6	22	3.542	1.94924	.	.	6	22	.	.	9.4	.	9.4	21.6	.	21.6	.	.	.
.	.	.	.	.	.	.	.	.	.	.	.	.	.	.	.	.	.	.	.	.	.	.	.	.	.	.
M 66	3	2	60	23	13	1	2	.	.	.	.	4.6	10	4.6	10	1.61	0.96807	.	9.3	9.3	.	20	20	.	.	.
M 66	3	2	60	23	13	2	2	.	.	.	.	5.2	11	5.2	11	1.771	1.02224	.	9.5	9.5	.	17.5	17.5	.	47.4	47.4
M 66	3	2	60	23	13	3	2	.	.	.	.	4.4	11	4.4	11	1.771	1.08077	.	8.2	8.2	.	17.2	17.2	.	47.8	47.8
M 66	3	2	60	23	13	4	2	.	.	.	.	4.9	12	4.9	12	1.932	1.13747	.	9.1	9.1	.	20.7	20.7	.	52	52
M 66	3	2	60	23	13	5	2	.	.	.	.	4.9	11	4.9	11	1.771	1.04269	.	8.7	8.7	.	18.4	18.4	.	59	59
M 66	3	2	60	23	13	6	2	.	.	.	.	5.3	11	5.3	11	1.771	1.01577	.	7.8	7.8	.	21.5	21.5	.	51.8	51.8
M 66	3	2	60	23	13	7	2	.	.	.	.	4.6	11	4.6	11	1.771	1.06488	.	8.9	8.9	.	18.2	18.2	.	47.3	47.3
M 66	3	2	60	23	13	8	1	4.8	19	3.059	1.81342	.	.	4.8	19	.	.	8.3	.	8.3	18.8	.	18.8	51.1	.	51.1
M 66	3	2	60	23	13	9	1	5	20	3.22	1.88307	.	.	5	20	.	.	7.9	.	7.9	19.3	.	19.3	51.1	.	51.1
M 66	3	2	60	23	13	10	1	4.2	19	3.059	1.89596	.	.	4.2	19	.	.	8.9	.	8.9	19	.	19	52.3	.	52.3
M 66	3	2	60	23	13	11	1	4.9	21	3.381	1.99058	.	.	4.9	21	.	.	8	.	8	19.4	.	19.4	54.7	.	54.7
M 66	3	2	60	23	13	12	1	5.2	20	3.22	1.85861	.	.	5.2	20	.	.	9.8	.	9.8	20.5	.	20.5	.	.	.
M 66	3	2	60	23	13	13	1	4.4	20	3.22	1.96504	.	.	4.4	20	.	.	9.1	.	9.1	20.8	.	20.8	.	.	.
.	.	.	.	.	.	.	.	.	.	.	.	.	.	.	.	.	.	.	.	.	.	.	.	.	.	.
.	.	.	.	.	.	.	.	.	.	.	.	.	.	.	.	.	.	.	.	.	.	.	.	.	.	.
.	.	.	.	.	.	.	.	.	.		.	.	.	.	.		.	.	.	.	.	.	.	.	.	.
.	.	.	.	.	.	.	.	.	.	.	.	.	.	.	.	.	.	.	.	.	.	.	.	.	.	.
Kuldgns	.	.	.	.	.	.	.	.	.	.	.	.	.	.	.	.	.			.	.	.	.	.	.	.
M 1	1	1	0	22	8	.	.	6.06667	24.3333	3.91767	2.15051	6.26	13	6.1875	.	2.093	1.13587	16.3667	16.94	16.725	35.7333	36.56	36.25	80	81.75	81.1667
M 2	1	1	0	23	11	.	.	6.2	24	3.864	2.10541	5.96667	12.3333	6.07273	.	1.98567	1.09491	11.92	11.7	11.8	24.1	24.0833	24.0909	60.25	59.8	60
M 3	1	1	0	23	11	.	.	6.4	22.75	3.66275	1.9727	5.7	11.8571	5.95455	.	1.909	1.07014	12.275	11.4857	11.7727	27.75	26.3333	26.9	65	59.4	61.5
M 4	1	1	0	23	13	.	.	6.37778	25.4444	4.09656	2.2101	5.675	13	6.16154	.	2.093	1.17596	11.5111	11.2	11.4154	25.4111	25	25.2846	59.75	60	59.8182
M 5	1	1	0	23	14	.	.	5.92857	24.2857	3.91	2.16057	5.7	13.7143	5.81429	.	2.208	1.23653	10.9857	10.7143	10.85	23.6714	22.8714	23.2714	59.6667	60.1667	59.9167
M 6	1	1	0	23.5	12	.	.	6	24.125	3.88413	2.14004	5.9	13.25	5.96667	.	2.13325	1.18094	12.3625	12.35	12.3583	27.8875	26.7	27.4917	67.5714	66	67.1
M 7	1	1	0	23	11	.	.	6.15714	24.8571	4.002	2.18352	5.975	13	6.09091	.	2.093	1.1548	11.7	11.325	11.5636	24.8571	23.45	24.3455	62.1667	60.6667	61.6667
M 8	1	1	0	.	.	.	.	.	.	.	.	.	.	.	.	.	.	.	.	.	.	.	.	.	.	.
M 9	1	1	0	23	11	.	.	5.96667	23	3.703	2.04133	5.7625	12.5	5.81818	.	2.0125	1.12506	12	11.975	11.9818	27.5667	27.0125	27.1636	67	65	65.6
M 10	1	1	0	23.5	3	.	.	6.7	25	4.025	2.13505	6.85	13.5	6.8	.	2.1735	1.14456	13.4	13.05	13.1667	26.6	27.25	27.0333	#DIV/0!	60	60
M 11	2	1	40	23	11	.	.	6.15556	20.3333	3.27367	1.78653	5.85	11	6.1	.	1.771	0.984821	11.6889	11.3	11.6182	28.3222	27.7	28.2091	70.125	62	69.2222
M 12	2	1	40	23	10	.	.	7.02	20.4	3.2844	1.71576	6.64	11.2	6.83	.	1.8032	0.959513	13.7	13.4	13.55	29.62	29.1	29.36	73.75	70.5	72.125
M 13	2	1	40	22	13	.	.	5.27143	20.8571	3.358	1.93054	5.06667	10.8333	5.17692	.	1.74417	1.01543	12.3143	11.5667	11.9692	24.9143	23.95	24.4692	60.8333	59.4	60.1818
M 14	2	1	40	23	13	.	.	5.74444	21.1111	3.39889	1.89987	6.025	11.25	5.83077	.	1.81125	0.994937	10.6	11.175	10.7769	26.3556	27.25	26.6308	67.125	67.3333	67.1818
M 15	2	1	40	23	10	.	.	5.42	21.6	3.4776	1.98197	5.08	11	5.25	.	1.771	1.03092	10.28	10.4	10.34	23.18	23.5	23.34	58.25	58.75	58.5
M 16	2	1	40	.	.	.	.	.	.	.	.	.	.	.	.	.	.	.	.	.	.	.	.	.	.	.
M 17	2	1	40	23	12	.	.	6.1	22.2	3.5742	1.95661	5.98571	11.8571	6.03333	.	1.909	1.05175	11.64	11.1429	11.35	25.68	25.5857	25.625	64.25	63	63.5
M 18	2	1	40	23	8	.	.	7.06667	23	3.703	1.92969	6.68	12.2	6.825	.	1.9642	1.04336	14.1667	13.54	13.775	31.9667	30.98	31.35	77.5	71.5	73.5
M 19	2	1	40	23	12	.	.	5.73333	21.3333	3.43467	1.92066	5.58333	11.6667	5.65833	.	1.87833	1.06012	10.2167	10.0333	10.125	23.3667	23.6	23.4833	60.8	60.2	60.5
M 20	2	1	40	23	3	.	.	7.1	25	4.025	2.09418	6.65	12	6.8	.	1.932	1.02771	17.6	16.3	16.7333	41.1	40.45	40.6667	#DIV/0!	75	75
M 21	2	1	40	23	14	.	.	5.54	21.2	3.4132	1.92922	5.51111	11.3333	5.52143	.	1.82467	1.03347	9.66	9.74444	9.71429	21.8	21.1444	21.3786	53.5	53.75	53.6667
M 22	2	1	40	23	10	.	.	6.88571	21.4286	3.45	1.81501	6.63333	11.6667	6.81	.	1.87833	0.999715	14.8429	14.2667	14.67	33.6714	33.3333	33.57	74.5	71	73.625
M 23	3	1	60	23	14	.	.	6.22857	22.2857	3.588	1.95248	6.1	12.2857	6.16429	.	1.978	1.08287	9.92857	9.62857	9.77857	21.1	19.8143	20.4571	55.3333	52.5	53.9167
M 24	3	1	60	23	13	.	.	5.75714	23.7143	3.818	2.13117	5.5	11.8333	5.63846	.	1.90517	1.07993	9.71429	9.6	9.66154	24.1857	24.0167	24.1077	57.8333	59.8	58.7273
M 25	3	1	60	23	13	.	.	5.475	23	3.703	2.10175	5.4	12.4	5.44615	.	1.9964	1.13808	10.1875	9.96	10.1	24.3875	23.36	23.9923	59.5714	56	58.2727
M 26	3	1	60	23	10	.	.	6.575	22.75	3.66275	1.95495	6.18333	12.8333	6.34	.	2.06617	1.12668	13.025	12.7667	12.87	28.025	27.7333	27.85	70.3333	67	68.25
M 27	3	1	60	.	.	.	.	.	.	.	.	.	.	.	.	.	.	.	.	.	.	.	.	.	.	.
M 28	3	1	60	23.5	11	.	.	6.18	22.8	3.6708	2.00195	6.13333	11.6667	6.15455	.	1.87833	1.02651	11.4	11.4833	11.4455	23.9	23.7333	23.8091	61.5	61.8	61.6667
M 29	3	1	60	23	14	.	.	5.2375	22.125	3.56213	2.05215	4.98333	12	5.12857	.	1.932	1.13118	8.1125	8.05	8.08571	19.9375	19.5	19.75	48.8571	48	48.5
M 30	3	1	60	23	11	.	.	6.05	23	3.703	2.03283	5.9	12	5.95455	.	1.932	1.06944	10.925	11.0286	10.9909	25.05	25.6143	25.4091	61.6667	62	61.8889
M 31	3	1	60	23	4	.	.	6	22	3.542	1.94936	6.05	11	6.025	.	1.771	0.971941	13.8	13.9	13.85	34.35	34.8	34.575	77	75	76
M 32	3	1	60	23	11	.	.	6.06667	21	3.381	1.85427	5.68	12.4	5.89091	.	1.9964	1.11931	9.96667	9.48	9.74545	.	.	.	.	.	.
M 33	3	1	60	23	13	.	.	5.525	23	3.703	2.09577	5.23333	12.6667	5.32308	.	2.03933	1.17502	10.15	9.85556	9.94615	22.575	22.5556	22.5615	57.6667	57.125	57.2727
M 34	3	1	60	23	12	.	.	5.9	22.5	3.6225	2.00594	5.61667	12.6667	5.75833	.	2.03933	1.14785	11.5667	10.9333	11.25	25.35	24.45	24.9	64.6	60.8	62.7
M 35	1	2	0	23	13	.	.	6.2	25	4.025	2.19232	5.93	12.4	5.99231	.	1.9964	1.10349	12.4667	11.71	11.8846	27.7	26.23	26.5692	70.55	65.5111	66.4273
M 36	1	2	0	23	12	.	.	6.18333	24.6667	3.97133	2.16411	5.83333	12.3333	6.00833	.	1.98567	1.10308	12.54	12.36	12.45	32.075	31.2	31.5889	76.6333	71.425	73.6571
M 37	1	2	0	23	15	.	.	5.88571	24.7143	3.979	2.20582	5.675	13.5	5.77333	.	2.1735	1.21877	10.7714	10.6875	10.7267	23.6429	22.9	23.2467	57.5667	54.5857	55.9615
M 38	1	2	0	23	8	.	.	6.44	24.2	3.8962	2.09615	6.33333	13	6.4	.	2.093	1.13151	13.18	13.6333	13.35	30.64	31.3333	30.9	76.275	75.15	75.9
M 39	1	2	0	23	12	.	.	6.31667	23.6667	3.81033	2.06188	5.8	12.6667	6.05833	.	2.03933	1.13518	11.5667	10.95	11.2583	26.0167	25.2833	25.65	62.48	58.3	60.39
M 40	1	2	0	23	9	.	.	7	25.75	4.14575	2.16727	6.62	13.6	6.78889	.	2.1896	1.16608	14.5	13.78	14.1	30.525	28.66	29.4889	72.3333	69.525	70.7286
M 41	1	2	0	23	12	.	.	6.6	24.8	3.9928	2.12925	6.01429	13.4286	6.25833	.	2.162	1.19067	12.22	11.7571	11.95	26.88	25.6429	26.1583	66.15	62.2333	63.8
M 42	1	2	0	23	14	.	.	5.44	23.2	3.7352	2.12405	5.16667	12.5556	5.26429	.	2.02144	1.17125	9.56	9.17778	9.31429	23.02	21.4667	22.0214	59.775	61.6	60.9364
M 43	1	2	0	23	13	.	.	5.08889	23.5556	3.79244	2.20516	4.925	12.5	5.03846	.	2.0125	1.18314	9.91111	9.625	9.82308	24.4333	24.375	24.4154	60.3375	56.7333	59.3545
M 44	1	2	0	23	12	.	.	6.06667	24	3.864	2.11923	5.58333	12.5	5.825	.	2.0125	1.13568	11.7333	11.1833	11.4583	26.2833	25.4	25.8417	67.76	63.46	65.61
M 45	1	2	0	23	5	.	.	7	24	3.864	2.01994	6.8	12.75	6.84	.	2.05275	1.08343	15.9	15.45	15.54	37.6	36.7	36.88	#DIV/0!	78.7333	78.7333
M 46	1	2	0	23	9	.	.	6.275	24.75	3.98475	2.16157	6.24	12.6	6.25556	.	2.0286	1.10221	15	15.32	15.1778	33.9	34.28	34.1111	84.9	80.45	82.3571
M 47	2	2	40	23	12	.	.	5.425	21.75	3.50175	1.99313	5.2625	11.5	5.31667	.	1.8515	1.06444	8.85	8.8375	8.84167	22.4	22.475	22.45	57.4	56.7143	56.92
M 48	2	2	40	.	.	.	.	.	.	.	.	.	.	.	.	.	.	.	.	.	.	.	.	.	.	.
M 49	2	2	40	23	11	.	.	6.72	22	3.542	1.87753	6.28333	12	6.48182	.	1.932	1.0473	12.18	11.8333	11.9909	25.32	23.8167	24.5	66	62.12	63.8444
M 50	2	2	40	23	10	.	.	6.625	22	3.542	1.88669	6.41667	12.1667	6.5	.	1.95883	1.05453	13.6	13.1	13.3	29.05	28.5833	28.77	69.4667	67.52	68.25
M 51	2	2	40	23	6	.	.	7.05	21	3.381	1.76343	6.65	11.5	6.78333	.	1.8515	0.984747	15.85	14.875	15.2	36.45	35.175	35.6	85.05	81.5667	82.96
M 52	2	2	40	23	15	.	.	5.7	21.6667	3.48833	1.95493	5.45833	11.1667	5.50667	.	1.79783	1.02178	8.4	8.47273	8.45714	23	22.6636	22.7357	65.2	60.11	60.9583
M 53	2	2	40	23	12	.	.	6.05	21.3333	3.43467	1.8866	5.51667	11	5.78333	.	1.771	1.00349	10.45	10.2333	10.3417	23.3667	22.6	22.9833	58.94	57.78	58.36
M 54	2	2	40	23	5	.	.	7.5	24	3.864	1.97401	6.95	12.25	7.06	.	1.97225	1.03461	17.4	16.3	16.52	40.6	37.775	38.34	98.6	86.2333	89.325
M 55	2	2	40	23	13	.	.	6.1	21.2857	3.427	1.87635	5.78333	11.1667	5.95385	.	1.79783	1.00209	12.8429	12.3167	12.6	28.6714	26.8833	27.8462	64.5333	61.82	63.3
M 56	2	2	40	23	13	.	.	5.83333	21.3333	3.43467	1.90829	5.82857	11.5714	5.83077	.	1.863	1.03604	10	10.2571	10.1385	22.9	22.4571	22.6615	56.6	55.7	56.1091
M 57	3	2	60	23	8	.	.	7.15	24	3.864	2.00591	6.96667	12.6667	7.0125	.	2.03933	1.06786	14.55	14.4833	14.5	32.25	32.3	32.2875	74.35	74.18	74.2286
M 58	3	2	60	.	.	.	.	.	.	.	.	.	.	.	.	.	.	.	.	.	.	.	.	.	.	.
M 59	3	2	60	23	11	.	.	6.32	21.6	3.4776	1.88201	5.91667	11.8333	6.1	.	1.90517	1.05376	12.34	11.0833	11.6545	26.72	24.0333	25.2545	66.875	60.08	63.1
M 60	3	2	60	23	14	.	.	5.8	21.625	3.48163	1.93835	5.6	12.1667	5.71429	.	1.95883	1.10302	10.1714	10.3667	10.2615	22.8571	22.3667	22.6308	55.05	54.38	54.7455
M 61	3	2	60	23	4	.	.	7	23.5	3.7835	1.97781	6.75	13	6.875	.	2.093	1.10814	15.8	16.2	16	33.85	34.65	34.25	69.7	67.1	68.4
M 62	3	2	60	23	13	.	.	5	21.1429	3.404	1.99277	4.76667	11.6667	4.89231	.	1.87833	1.11622	9	8.36667	8.525	28.5	28.9667	28.85	#DIV/0!	69.4	69.4
M 63	3	2	60	23	2	.	.	.	.	.	.	7.4	14	7.4	.	2.254	1.15709	.	15.25	15.25	.	35.4	35.4	.	67.3	67.3
M 64	3	2	60	23	13	.	.	6.1	22.5714	3.634	1.98915	5.91667	11.8333	6.01538	.	1.90517	1.05364	11.4857	11.5667	11.5231	25.9429	25.25	25.6231	62.5667	62.42	62.5
M 65	3	2	60	23	12	.	.	5.68571	22.8571	3.68	2.06257	5.62	11.8	5.65833	.	1.8998	1.06904	9.17143	9.1	9.14167	22.0571	21.98	22.025	58.45	56.7	57.75
M 66	3	2	60	23	13	.	.	4.75	19.8333	3.19317	1.90111	4.84286	11	4.8	.	1.771	1.04741	8.66667	8.78571	8.73077	19.6333	19.0714	19.3308	52.3	50.8833	51.45

## Sheet: Nipple retention
code$	study$	dose	litter	pup_no	nipple
6:1-2	0014-01	0	1	6	0
6:1-2	0014-01	0	1	7	0
6:1-2	0014-01	0	1	8	0
6:1-2	0014-01	0	2	7	0
6:1-2	0014-01	0	2	8	0
6:1-2	0014-01	0	2	9	0
6:1-2	0014-01	0	2	10	0
6:1-2	0014-01	0	2	11	0
6:1-2	0014-01	0	3	8	0
6:1-2	0014-01	0	3	9	0
6:1-2	0014-01	0	3	10	0
6:1-2	0014-01	0	3	11	0
6:1-2	0014-01	0	4	5	0
6:1-2	0014-01	0	4	6	0
6:1-2	0014-01	0	4	7	0
6:1-2	0014-01	0	4	8	0
6:1-2	0014-01	0	4	9	0
6:1-2	0014-01	0	4	10	0
6:1-2	0014-01	0	4	11	0
6:1-2	0014-01	0	4	12	0
6:1-2	0014-01	0	4	13	0
6:1-2	0014-01	0	5	8	0
6:1-2	0014-01	0	5	9	0
6:1-2	0014-01	0	5	10	0
6:1-2	0014-01	0	5	11	0
6:1-2	0014-01	0	5	12	0
6:1-2	0014-01	0	5	13	0
6:1-2	0014-01	0	5	14	0
6:1-2	0014-01	0	6	5	0
6:1-2	0014-01	0	6	6	0
6:1-2	0014-01	0	6	7	0
6:1-2	0014-01	0	6	8	0
6:1-2	0014-01	0	6	9	0
6:1-2	0014-01	0	6	10	0
6:1-2	0014-01	0	6	11	0
6:1-2	0014-01	0	6	12	0
6:1-2	0014-01	0	7	5	0
6:1-2	0014-01	0	7	6	0
6:1-2	0014-01	0	7	7	0
6:1-2	0014-01	0	7	8	0
6:1-2	0014-01	0	7	9	0
6:1-2	0014-01	0	7	10	0
6:1-2	0014-01	0	7	11	0
6:1-2	0014-01	0	9	9	0
6:1-2	0014-01	0	9	10	0
6:1-2	0014-01	0	9	11	0
6:1-2	0014-01	0	10	3	0
6:1-2	0014-01	0	35	11	0
6:1-2	0014-01	0	35	12	0
6:1-2	0014-01	0	35	13	0
6:1-2	0014-01	0	36	9	0
6:1-2	0014-01	0	36	10	0
6:1-2	0014-01	0	36	11	0
6:1-2	0014-01	0	36	12	0
6:1-2	0014-01	0	37	9	0
6:1-2	0014-01	0	37	10	0
6:1-2	0014-01	0	37	11	0
6:1-2	0014-01	0	37	12	0
6:1-2	0014-01	0	37	13	0
6:1-2	0014-01	0	37	14	0
6:1-2	0014-01	0	37	15	0
6:1-2	0014-01	0	38	4	0
6:1-2	0014-01	0	38	5	0
6:1-2	0014-01	0	38	6	0
6:1-2	0014-01	0	38	7	0
6:1-2	0014-01	0	38	8	0
6:1-2	0014-01	0	39	7	0
6:1-2	0014-01	0	39	8	0
6:1-2	0014-01	0	39	9	0
6:1-2	0014-01	0	39	10	0
6:1-2	0014-01	0	39	11	0
6:1-2	0014-01	0	39	12	0
6:1-2	0014-01	0	40	6	0
6:1-2	0014-01	0	40	7	0
6:1-2	0014-01	0	40	8	0
6:1-2	0014-01	0	40	9	0
6:1-2	0014-01	0	41	8	0
6:1-2	0014-01	0	41	9	0
6:1-2	0014-01	0	41	10	0
6:1-2	0014-01	0	41	11	0
6:1-2	0014-01	0	41	12	0
6:1-2	0014-01	0	42	10	0
6:1-2	0014-01	0	42	11	0
6:1-2	0014-01	0	42	12	0
6:1-2	0014-01	0	42	13	0
6:1-2	0014-01	0	42	14	0
6:1-2	0014-01	0	43	5	2
6:1-2	0014-01	0	43	6	0
6:1-2	0014-01	0	43	7	0
6:1-2	0014-01	0	43	8	0
6:1-2	0014-01	0	43	9	0
6:1-2	0014-01	0	43	10	1
6:1-2	0014-01	0	43	11	0
6:1-2	0014-01	0	43	12	0
6:1-2	0014-01	0	43	13	0
6:1-2	0014-01	0	44	7	0
6:1-2	0014-01	0	44	8	0
6:1-2	0014-01	0	44	9	0
6:1-2	0014-01	0	44	10	0
6:1-2	0014-01	0	44	11	0
6:1-2	0014-01	0	44	12	0
6:1-2	0014-01	0	45	5	0
6:1-2	0014-01	0	46	6	0
6:1-2	0014-01	0	46	7	0
6:1-2	0014-01	0	46	8	0
6:1-2	0014-01	0	46	9	0
6:1-2	0014-01	40	11	3	0
6:1-2	0014-01	40	11	4	0
6:1-2	0014-01	40	11	5	0
6:1-2	0014-01	40	11	6	0
6:1-2	0014-01	40	11	7	0
6:1-2	0014-01	40	11	8	0
6:1-2	0014-01	40	11	9	0
6:1-2	0014-01	40	11	10	0
6:1-2	0014-01	40	11	11	0
6:1-2	0014-01	40	12	6	0
6:1-2	0014-01	40	12	7	0
6:1-2	0014-01	40	12	8	0
6:1-2	0014-01	40	12	9	0
6:1-2	0014-01	40	12	10	0
6:1-2	0014-01	40	13	7	0
6:1-2	0014-01	40	13	8	0
6:1-2	0014-01	40	13	9	0
6:1-2	0014-01	40	13	10	0
6:1-2	0014-01	40	13	11	0
6:1-2	0014-01	40	13	12	0
6:1-2	0014-01	40	13	13	0
6:1-2	0014-01	40	14	5	1
6:1-2	0014-01	40	14	6	0
6:1-2	0014-01	40	14	7	0
6:1-2	0014-01	40	14	8	0
6:1-2	0014-01	40	14	9	0
6:1-2	0014-01	40	14	10	0
6:1-2	0014-01	40	14	11	0
6:1-2	0014-01	40	14	12	0
6:1-2	0014-01	40	14	13	0
6:1-2	0014-01	40	15	6	0
6:1-2	0014-01	40	15	7	0
6:1-2	0014-01	40	15	8	0
6:1-2	0014-01	40	15	9	0
6:1-2	0014-01	40	15	10	0
6:1-2	0014-01	40	17	8	0
6:1-2	0014-01	40	17	9	0
6:1-2	0014-01	40	17	10	0
6:1-2	0014-01	40	17	11	0
6:1-2	0014-01	40	17	12	0
6:1-2	0014-01	40	18	6	0
6:1-2	0014-01	40	18	7	0
6:1-2	0014-01	40	18	8	0
6:1-2	0014-01	40	19	7	0
6:1-2	0014-01	40	19	8	0
6:1-2	0014-01	40	19	9	0
6:1-2	0014-01	40	19	10	0
6:1-2	0014-01	40	19	11	0
6:1-2	0014-01	40	19	12	0
6:1-2	0014-01	40	20	3	0
6:1-2	0014-01	40	21	11	0
6:1-2	0014-01	40	21	12	0
6:1-2	0014-01	40	21	13	1
6:1-2	0014-01	40	21	14	0
6:1-2	0014-01	40	22	4	0
6:1-2	0014-01	40	22	5	0
6:1-2	0014-01	40	22	6	0
6:1-2	0014-01	40	22	7	1
6:1-2	0014-01	40	22	8	0
6:1-2	0014-01	40	22	9	0
6:1-2	0014-01	40	22	10	0
6:1-2	0014-01	40	47	9	1
6:1-2	0014-01	40	47	10	0
6:1-2	0014-01	40	47	11	0
6:1-2	0014-01	40	47	12	0
6:1-2	0014-01	40	49	7	0
6:1-2	0014-01	40	49	8	0
6:1-2	0014-01	40	49	9	0
6:1-2	0014-01	40	49	10	0
6:1-2	0014-01	40	49	11	0
6:1-2	0014-01	40	50	7	0
6:1-2	0014-01	40	50	8	0
6:1-2	0014-01	40	50	9	0
6:1-2	0014-01	40	50	10	0
6:1-2	0014-01	40	51	5	0
6:1-2	0014-01	40	51	6	0
6:1-2	0014-01	40	52	13	0
6:1-2	0014-01	40	52	14	0
6:1-2	0014-01	40	52	15	0
6:1-2	0014-01	40	53	7	0
6:1-2	0014-01	40	53	8	0
6:1-2	0014-01	40	53	9	0
6:1-2	0014-01	40	53	10	0
6:1-2	0014-01	40	53	11	0
6:1-2	0014-01	40	53	12	0
6:1-2	0014-01	40	54	5	0
6:1-2	0014-01	40	55	7	0
6:1-2	0014-01	40	55	8	0
6:1-2	0014-01	40	55	9	0
6:1-2	0014-01	40	55	10	0
6:1-2	0014-01	40	55	11	0
6:1-2	0014-01	40	55	12	0
6:1-2	0014-01	40	55	13	0
6:1-2	0014-01	40	56	8	0
6:1-2	0014-01	40	56	9	0
6:1-2	0014-01	40	56	10	1
6:1-2	0014-01	40	56	11	0
6:1-2	0014-01	40	56	12	0
6:1-2	0014-01	40	56	13	0
6:1-2	0014-01	60	23	8	0
6:1-2	0014-01	60	23	9	0
6:1-2	0014-01	60	23	10	0
6:1-2	0014-01	60	23	11	0
6:1-2	0014-01	60	23	12	0
6:1-2	0014-01	60	23	13	1
6:1-2	0014-01	60	23	14	0
6:1-2	0014-01	60	24	7	0
6:1-2	0014-01	60	24	8	0
6:1-2	0014-01	60	24	9	0
6:1-2	0014-01	60	24	10	0
6:1-2	0014-01	60	24	11	0
6:1-2	0014-01	60	24	12	0
6:1-2	0014-01	60	24	13	0
6:1-2	0014-01	60	25	6	2
6:1-2	0014-01	60	25	7	0
6:1-2	0014-01	60	25	8	0
6:1-2	0014-01	60	25	9	2
6:1-2	0014-01	60	25	10	0
6:1-2	0014-01	60	25	11	2
6:1-2	0014-01	60	25	12	0
6:1-2	0014-01	60	25	13	2
6:1-2	0014-01	60	26	7	0
6:1-2	0014-01	60	26	8	0
6:1-2	0014-01	60	26	9	0
6:1-2	0014-01	60	26	10	2
6:1-2	0014-01	60	28	7	0
6:1-2	0014-01	60	28	8	0
6:1-2	0014-01	60	28	9	0
6:1-2	0014-01	60	28	10	0
6:1-2	0014-01	60	28	11	2
6:1-2	0014-01	60	29	7	0
6:1-2	0014-01	60	29	8	0
6:1-2	0014-01	60	29	9	0
6:1-2	0014-01	60	29	10	0
6:1-2	0014-01	60	29	11	0
6:1-2	0014-01	60	29	12	0
6:1-2	0014-01	60	29	13	1
6:1-2	0014-01	60	29	14	0
6:1-2	0014-01	60	30	8	0
6:1-2	0014-01	60	30	9	0
6:1-2	0014-01	60	30	10	0
6:1-2	0014-01	60	30	11	0
6:1-2	0014-01	60	31	3	0
6:1-2	0014-01	60	31	4	1
6:1-2	0014-01	60	32	6	0
6:1-2	0014-01	60	32	7	0
6:1-2	0014-01	60	32	8	0
6:1-2	0014-01	60	32	9	0
6:1-2	0014-01	60	32	10	0
6:1-2	0014-01	60	32	11	0
6:1-2	0014-01	60	33	10	0
6:1-2	0014-01	60	33	11	0
6:1-2	0014-01	60	33	12	0
6:1-2	0014-01	60	33	13	0
6:1-2	0014-01	60	34	7	0
6:1-2	0014-01	60	34	8	0
6:1-2	0014-01	60	34	9	0
6:1-2	0014-01	60	34	10	0
6:1-2	0014-01	60	34	11	0
6:1-2	0014-01	60	34	12	0
6:1-2	0014-01	60	57	7	0
6:1-2	0014-01	60	57	8	0
6:1-2	0014-01	60	59	7	0
6:1-2	0014-01	60	59	8	0
6:1-2	0014-01	60	59	9	0
6:1-2	0014-01	60	59	10	0
6:1-2	0014-01	60	59	11	0
6:1-2	0014-01	60	60	8	0
6:1-2	0014-01	60	60	9	2
6:1-2	0014-01	60	60	10	0
6:1-2	0014-01	60	60	11	0
6:1-2	0014-01	60	60	12	0
6:1-2	0014-01	60	60	13	0
6:1-2	0014-01	60	60	14	0
6:1-2	0014-01	60	61	3	0
6:1-2	0014-01	60	61	4	0
6:1-2	0014-01	60	62	7	0
6:1-2	0014-01	60	64	7	0
6:1-2	0014-01	60	64	8	0
6:1-2	0014-01	60	64	9	0
6:1-2	0014-01	60	64	10	0
6:1-2	0014-01	60	64	11	0
6:1-2	0014-01	60	64	12	0
6:1-2	0014-01	60	64	13	2
6:1-2	0014-01	60	65	6	0
6:1-2	0014-01	60	65	7	0
6:1-2	0014-01	60	65	8	0
6:1-2	0014-01	60	65	9	0
6:1-2	0014-01	60	65	10	0
6:1-2	0014-01	60	65	11	0
6:1-2	0014-01	60	65	12	0
6:1-2	0014-01	60	66	8	2
6:1-2	0014-01	60	66	9	2
6:1-2	0014-01	60	66	10	1
6:1-2	0014-01	60	66	11	0
6:1-2	0014-01	60	66	12	2
6:1-2	0014-01	60	66	13	2

## Sheet: Female mammary glands
Litter	blind no.	Block	Group	bw	Area	LG	TG	DistLnn	Elongation	ElongLog	Dist5	DistLnnScorer, 1=not reached ln, 2 =reached ln, 3 =past ln	PastLnn, 1=not reached or reached, 2=pastln			Litter	blind no.	Block	Group	bw	TEB
4	23	1	1	59	96.9308	15.6256	9.02992	-3.01109	2.75695	2.44043	.	1	1			30	1	1	3	65	37
7	24	1	1	62	97.7163	11.5708	9.47386	-1.66774	3.19466	2.50442	.	1	1			25	2	1	3	55	0
35	6	2	1	64	64.2817	11.6248	6.66819	-0.467161	1.08519	2.0355	.	1	1			15	3	1	2	60	9
43	28	2	1	55.7	86.5343	14.7201	7.67551	-2.35818	1.85798	2.26904	2.74816	1	1			10	4	1	1	60	27
44	19	2	1	60.1	75.8818	12.3857	9.3713	-1.86355	2.95459	2.4705	3.70314	1	1			2	5	1	1	63	6
46	21	2	1	80.1	103.645	15.2596	8.48534	-1.081	2.09086	2.32033	.	1	1			21	6	1	2	52	18
2	5	1	1	63	48.5473	11.7186	4.50922	0	2.19148	2.34074	6.27813	2	1			29	7	1	3	50	3
3	27	1	1	62	51.152	8.79789	8.05185	0	2.12082	2.3265	4.04408	2	1			13	8	1	2	56	15
5	11	1	1	59	54.6672	11.956	5.90171	0	0.836717	1.92258	.	2	1			24	10	1	3	63	12
9	17	1	1	68	65.3761	12.1114	6.73865	0	1.64057	2.215	8.96682	2	1			5	11	1	1	59	4
10	4	1	1	60	62.7085	11.9454	5.23938	0	2.64037	2.42167	.	2	1			20	14	1	2	75	18
36	23	2	1	70.2	47.8604	10.8204	6.12324	0	2.40607	2.38131	.	2	1			22	15	1	2	74	34
37	16	2	1	57.3	40.5066	8.77064	6.16533	0	1.96744	2.2939	.	2	1			1	16	1	1	86	32
39	10	2	1	58.1	47.1	8.81558	7.19987	0	0.740254	1.86938	.	2	1			9	17	1	1	68	10
40	22	2	1	68.3	66.4685	12.2002	9.03136	0	.	.	.	2	1			33	19	1	3	57	3
41	25	2	1	63.1	60.8895	8.27796	8.57178	0	2.42432	2.38459	.	2	1			28	20	1	3	63	14
42	12	2	1	58.9	51.2251	11.1193	5.90566	0	1.71274	2.23369	7.67956	2	1			19	21	1	2	62	2
1	16	1	1	86	78.3909	11.3921	8.78462	0.417842	3.20816	2.50626	.	3	2			12	22	1	2	73	38
38	20	2	1	74.2	33.9732	8.22275	4.99355	0.498922	2.20396	2.3432	.	3	2			4	23	1	1	59	23
45	15	2	1	78	37.9615	10.7682	4.636	0.603222	1.80488	2.25645	.	3	2			7	24	1	1	62	37
6	18	1	1	67	.	.	.	.	.	.	.	.	.			23	25	1	3	52	3
13	8	1	2	56	44.3736	10.1398	5.82736	-0.224861	2.22319	2.34698	4.7868	1	1			31	26	1	3	75	15
22	15	1	2	74	89.8391	13.6603	8.6897	-2.29276	2.60329	2.41552	0.686332	1	1			3	27	1	1	62	24
55	26	2	2	61	54.3368	11.6753	6.70638	-0.540498	.	.	.	1	1			26	28	1	3	70	10
56	29	2	2	55.9	42.6969	9.67253	5.4472	-0.640404	3.53898	2.54888	.	1	1			17	29	1	2	64	8
12	22	1	2	73	68.0748	10.6529	8.11014	0	2.67775	2.42777	7.85009	2	1			52	1	2	2	58.1	2
14	13	1	2	67	68.3765	11.0826	7.5768	0	4.5433	2.65737	3.48676	2	1			66	2	2	3	52	1
15	3	1	2	60	25.097	6.37215	5.37261	0	1.35224	2.13105	.	2	1			60	4	2	3	54.6	4
17	29	1	2	64	58.4061	8.72142	7.95683	0	3.96378	2.59811	6.76821	2	1			53	5	2	2	54.9	30
18	9	1	2	71	55.815	12.3955	5.75219	0	1.43184	2.15589	.	2	1			35	6	2	1	64	22
19	21	1	2	62	55.9754	10.555	6.2505	0	1.67602	2.22428	.	2	1			47	7	2	2	57.9	22
20	14	1	2	75	57.7504	12.1209	6.56798	0	0.291779	1.46505	.	2	1			50	8	2	2	69.1	10
21	6	1	2	52	50.3363	10.31	5.64194	0	1.65055	2.21763	.	2	1			63	9	2	3	67.3	0
47	7	2	2	57.9	41.4725	8.5098	6.3407	0	1.49907	2.17582	5.45088	2	1			39	10	2	1	58.1	21
49	13	2	2	63.2	31.9019	10.5369	3.855	0	1.85501	2.26835	7.87505	2	1			61	11	2	3	67.1	23
50	8	2	2	69.1	53.5922	10.0035	6.44454	0	1.8946	2.27752	.	2	1			42	12	2	1	58.9	2
52	1	2	2	58.1	58.4276	11.373	6.76821	0	.	.	8.03853	2	1			49	13	2	2	63.2	3
54	14	2	2	86.2	36.6562	9.06918	6.14353	0	.	.	8.99569	2	1			45	15	2	1	78	4
51	27	2	2	87.1	46.2744	10.0483	5.56143	0.440989	1.04398	2.01869	11.0726	3	2			64	17	2	3	60.9	2
53	5	2	2	54.9	51.4985	10.3306	6.57387	0.500651	2.01122	2.30346	8.22107	3	2			59	18	2	3	60.8	5
26	28	1	3	70	74.6572	11.4735	8.71051	-0.332614	.	.	8.2741	1	1			44	19	2	1	60.1	15
33	19	1	3	57	82.0319	14.6356	6.90188	-0.97062	2.91927	2.46527	4.21241	1	1			38	20	2	1	74.2	3
57	3	2	3	69.1	61.6387	11.5384	8.01441	-0.415768	1.00475	2.00206	0.302684	1	1			46	21	2	1	80.1	1
60	4	2	3	54.6	50.2071	10.5397	6.11236	-1.39344	.	.	.	1	1			40	22	2	1	68.3	5
64	17	2	3	60.9	55.3132	10.5492	6.16242	-0.559745	.	.	6.21698	1	1			41	25	2	1	63.1	8
66	2	2	3	52	40.9751	7.42876	5.90625	-0.726108	1.41178	2.14977	4.71549	1	1			55	26	2	2	61	16
23	25	1	3	52	28.2762	6.63629	4.46448	0	2.52782	2.40275	.	2	1			51	27	2	2	87.1	11
29	7	1	3	50	38.8005	8.43305	6.58963	0	1.80871	2.25737	.	2	1			43	28	2	1	55.7	44
30	1	1	3	65	72.5075	12.0231	7.63936	0	2.49803	2.3976	6.42581	2	1			56	29	2	2	55.9	1
34	12	1	3	64	57.8053	9.84062	7.7334	0	2.23125	2.34855	.	2	1			65	30	2	3	54.9	0
59	18	2	3	60.8	67.1224	11.4472	5.84287	0	2.0139	2.30404	.	2	1
61	11	2	3	67.1	57.1581	12.4698	5.19698	0	.	.	.	2	1
65	30	2	3	54.9	43.2265	10.1489	5.10401	0	.	.	.	2	1
24	10	1	3	63	57.1289	10.9896	7.04822	0.831536	2.8165	2.44971	10.644	3	2
28	20	1	3	63	29.933	11.2245	3.48061	1.09134	2.04753	2.31123	.	3	2
31	26	1	3	75	58.3505	9.87149	6.88482	0.583558	2.05416	2.31264	12.1846	3	2
62	24	2	3	68	30.495	9.19985	4.44201	0.250325	.	.	.	3	2
63	9	2	3	67.3	36.2638	9.4861	3.65598	1.66359	1.64767	2.21687	4.24414	3	2
25	2	1	3	55	.	.	.	.	.	.	.	.	.

## Sheet: Male mammary glands
Litter	Blind no.	Block	Grop	bw	Area	LG	TG	DistLnn	Elongation	TEB	Dist5	LnAreal	LnDistlnn	DistLnnScore, 1=not reached ln, 2 =reached ln, 3 =past ln	LnElongation
7	24	1	1	61	69.0543	12.9588	6.31954	-0.677452	8.47388	5	6.23235	4.23489	-1.1315	3	2.13699
9	22	1	1	66	.	8.14409	6.0778	0	.	1	9.9055	.	0	2	.
37	3	2	1	57.2	37.4105	9.21256	5.13932	0	6.12724	2	.	3.62195	0	2	1.81274
39	4	2	1	63.7	32.4917	6.69484	5.42902	0	5.64399	3	6.67032	3.48098	0	2	1.73059
4	25	1	1	59	.	8.3798	6.99299	0.0755874	.	11	7.36663	.	0.0728669	1	.
5	16	1	1	61	28.7871	8.09342	4.93781	0.0891857	6.44591	1	8.64794	3.35993	0.0854304	1	1.86345
46	5	2	1	80.1	59.1049	12.0581	6.50748	0.104711	10.4474	4	.	4.07931	0.0995834	1	2.34635
41	16	2	1	63.1	31.9865	7.15354	6.61005	0.151016	5.83279	2	9.37761	3.46531	0.140645	1	1.76349
44	6	2	1	68.7	34.201	8.24979	5.58477	0.329404	6.02314	0	9.5045	3.53225	0.284731	1	1.79561
38	7	2	1	77.3	23.4402	5.64747	4.93061	0.496465	5.17084	1	11.582	3.15445	0.403106	1	1.64303
6	27	1	1	71	51.5932	10.4868	5.97847	0.525779	7.61472	4	13.4854	3.94339	0.422505	1	2.03008
43	12	2	1	60.3	43.686	10.0658	5.41102	0.575051	7.41008	2	.	3.77703	0.454288	1	2.00284
42	14	2	1	56.1	46.2274	9.92051	6.0302	0.69394	9.48909	1	.	3.83357	0.527057	1	2.25014
40	1	2	1	72.1	49.9624	10.4622	6.01097	0.777119	6.79716	12	.	3.91127	0.574994	1	1.91651
2	6	1	1	57	36.4884	8.11446	6.37728	1.29048	6.58418	4	.	3.597	0.828763	1	1.88467
3	8	1	1	65	33.9243	10.0597	5.23068	1.93198	7.29542	3	9.6786	3.52413	1.07568	1	1.98725
36	10	2	1	78.7	.	6.74434	.	3.73616	.	0	12.8363	.	1.55523	1	.
22	21	1	2	75	82.9986	14.8338	8.02976	-0.704264	11.3066	.	3.98529	4.41882	-1.21829	3	2.42538
49	15	2	2	64.8	20.3419	6.7726	3.88926	0	5.12239	1	8.60528	3.01268	0	2	1.63362
53	18	2	2	57.9	33.3626	8.79492	4.30741	0	5.61132	1	.	3.50744	0	2	1.72479
19	14	1	2	63	39.0716	8.96965	5.35716	0.0660182	6.39993	1	8.7819	3.66539	0.0639304	1	1.85629
47	11	2	2	54.2	36.5148	7.23134	6.0411	0.093656	6.24697	0	7.11693	3.59772	0.0895262	1	1.8321
55	13	2	2	60.4	18.4874	5.05778	4.72513	0.161862	5.73449	3	.	2.91709	0.150024	1	1.7465
56	9	2	2	55	14.3305	4.53047	3.73545	0.284844	4.53289	.	.	2.66239	0.250637	1	1.51136
13	12	1	2	61	39.0393	8.6994	6.11755	0.298911	6.78111	5	.	3.66457	0.261526	1	1.91414
15	17	1	2	62	40.4875	10.9875	5.0342	0.597091	6.79998	1	.	3.70099	0.468184	1	1.91692
12	13	1	2	75	42.9943	8.99072	6.13663	0.710119	6.32085	3	.	3.76107	0.536563	1	1.84385
17	15	1	2	64	25.0414	8.13421	3.54394	1.38426	6.54855	2	.	3.22053	0.868889	1	1.87924
14	19	1	2	73	31.892	9.24606	5.07372	2.08675	5.98992	2	.	3.46235	1.12712	1	1.79008
11	4	1	2	69	34.0714	7.05834	5.59534	2.26097	7.03892	2	.	3.52846	1.18202	1	1.95146
50	17	2	2	67.4	19.9837	6.54444	4.68603	2.41925	4.38656	.	.	2.99492	1.22942	1	1.47855
23	23	1	3	53	35.3946	8.775	5.03372	-0.180341	6.44913	3	7.07397	3.56656	-0.198867	3	1.86395
61	22	2	3	69.7	29.7364	6.62714	6.41348	0	5.70283	6	9.24818	3.39237	0	2	1.74096
66	2	2	3	51.1	19.7573	4.61131	5.76004	0	6.26124	0	6.5586	2.98352	0	2	1.83438
24	18	1	3	57	22.1087	8.58572	5.43882	0.0628925	5.87029	4	5.70749	3.09597	0.060994	1	1.7699
25	10	1	3	56	25.7966	9.14608	3.52423	0.147621	5.61241	0	.	3.25024	0.137691	1	1.72498
30	26	1	3	60	35.7098	8.63368	5.55234	0.252442	5.08579	4	12.672	3.57542	0.225095	1	1.62645
28	20	1	3	60	26.7461	10.1427	3.12261	0.264073	5.51342	2	.	3.28639	0.234339	1	1.70718
31	11	1	3	77	53.4854	10.525	5.98886	0.733368	8.3544	2	9.8786	3.97941	0.550066	1	2.12279
65	8	2	3	55.3	36.8697	10.0274	5.52082	0.805659	6.08346	5	.	3.60739	0.590926	1	1.80557
34	2	1	3	64	33.8466	9.92284	4.7284	1.38638	7.12618	3	12.0222	3.52184	0.869779	1	1.96378
59	21	2	3	66.6	31.7038	7.13437	5.84294	1.55855	5.6552	1	13.2435	3.45644	0.939441	1	1.73258
33	7	1	3	62	31.6738	7.93349	4.7567	1.62491	5.87262	2	12.2363	3.45549	0.965046	1	1.7703
64	20	2	3	60.5	35.7641	10.1293	5.27251	1.66513	6.94098	.	8.69993	3.57695	0.980252	1	1.93744
29	5	1	3	46	16.0761	6.22438	3.65601	2.10561	4.0281	3	.	2.77733	1.13321	1	1.3933
26	3	1	3	68	.	.	.	.	.	2	.	.	.	.	.

## Sheet: PD16 organ weights
PD16 organ weights
Females PD16								Males PD16
Litter	Group	bw	Rovar	Lovar				Litter	Group	bw	relprostate	prostate
1	1	40.4	0.0012	0.0004				1	1	41.7	0.0690647	0.0288
2	1	28.8	0.0022	0.0031				10	1	30.9	0.0330097	0.0102
3	1	28.7	0.0021	0.0021				2	1	28.1	0.0398577	0.0112
4	1	28.6	0.0017	0.002				3	1	31.6	0.0490506	0.0155
5	1	25.4	0.0021	0.0022				35	1	30.5	0.0354098	0.0108
6	1	30.3	0.0021	0.0023				36	1	36	0.0366667	0.0132
7	1	28.3	0.0028	0.0029				37	1	27.3	0.0249084	0.0068
9	1	28.9	0.0038	0.0024				38	1	26.9	0.0148699	0.004
10	1	32	0.0021	0.0022				39	1	28	0.0385714	0.0108
35	1	27.7	0.0027	0.0026				4	1	30.9	0.0372168	0.0115
36	1	35.9	0.0032	0.0027				40	1	34.4	0.0360465	0.0124
37	1	24.8	0.0019	0.0018				41	1	29.7	0.0387205	0.0115
38	1	36.1	0.0036	0.0034				42	1	26.2	0.0339695	0.0089
39	1	28.1	0.0019	0.0022				43	1	26.4	0.0359848	0.0095
40	1	32.2	0.0021	0.002				44	1	28.5	0.0319298	0.0091
41	1	27.1	0.0023	0.0022				46	1	37.7	0.0318302	0.012
42	1	23.8	0.0019	0.0021				5	1	27.2	0.0389706	0.0106
43	1	29	0.0019	0.0021				6	1	31.4	0.0471338	0.0148
44	1	31	0.0028	0.0027				7	1	28.4	0.0411972	0.0117
45	1	42.2	0.0026	0.0028				11	2	32.2	0.0440994	0.0142
46	1	38.3	0.0024	0.003				12	2	33.4	0.0547904	0.0183
11	2	32.6	0.0036	0.0038				13	2	27	0.032963	0.0089
12	2	33.4	0.0022	0.0023				14	2	30	0.0313333	0.0094
13	2	27	0.0029	0.0028				15	2	26.6	0.0274436	0.0073
14	2	31.3	0.0024	0.0021				17	2	28.5	0.0224561	0.0064
15	2	26.2	0.0023	0.003				18	2	37	0.027027	0.01
17	2	28.8	0.0027	0.003				19	2	26.8	0.0559701	0.015
18	2	36.3	0.0022	0.0025				20	2	46.2	0.0497835	0.023
19	2	25.9	0.002	0.0013				21	2	24.2	0.0194215	0.0047
20	2	46.2	0.0017	0.0007				22	2	33.7	0.0186944	0.0063
21	2	23.6	0.002	0.0021				47	2	25	0.0232	0.0058
22	2	37.9	0.002	0.0019				49	2	29	0.0110345	0.0032
47	2	25.5	0.0022	0.0022				50	2	32.9	0.0389058	0.0128
49	2	26	0.0021	0.0023				52	2	22.5	0.0284444	0.0064
50	2	32.1	0.0032	0.0034				53	2	25.7	0.0377432	0.0097
51	2	39.9	0.0016	0.0018				55	2	33.2	0.0240964	0.008
52	2	25	0.002	0.0021				56	2	25.2	0.0285714	0.0072
53	2	25.7	0.0019	0.0017				23	3	24.5	0.0114286	0.0028
54	2	41.4	0.0026	0.0028				25	3	28.9	0.0204152	0.0059
55	2	29.2	0.0022	0.0021				26	3	30	0.028	0.0084
56	2	25.7	0.0026	0.0027				28	3	28.8	0.0336806	0.0097
23	3	23.1	0.0025	0.0025				29	3	21.2	0.0226415	0.0048
24	3	26.8	0.001	0.0005				30	3	27.4	0.0175182	0.0048
25	3	27.2	0.0023	0.0025				31	3	39.9	0.0182957	0.0073
26	3	30.7	0.0022	0.0023				33	3	26.6	0.0266917	0.0071
28	3	28	0.0028	0.0025				34	3	27.8	0.0208633	0.0058
29	3	20.6	0.0016	0.0018				59	3	29	0.0258621	0.0075
30	3	28.7	0.0027	0.0031				60	3	25.6	0.0316406	0.0081
31	3	39.5	0.0022	0.0026				61	3	38.9	0.0280206	0.0109
33	3	25.9	0.0019	0.0021				62	3	34.9	0.022063	0.0077
34	3	26.8	0.0021	0.0025				64	3	28.6	0.027972	0.008
57	3	35	0.0031	0.0033				65	3	26	0.0265385	0.0069
59	3	27.5	0.0024	0.0024				66	3	21.7	0.0152074	0.0033
60	3	24	0.0018	0.0019
61	3	39.7	0.0024	0.0026
62	3	33.6	0.0017	0.0022
63	3	38.4	0.0021	0.0027
64	3	27.6	0.0023	0.0028
65	3	25.6	0.0016	0.0024
66	3	23.4	0.0021	0.0027

## Sheet: PD300 organ weights
PD300 organ weights
Animal no.	Group	Bw	prostate.+ ves.	vent.prost.
202	1	522		0.73
207	1	453	3.569	0.6751
208	1	482	2.9961	0.7577
213	1	476	3.0979	0.709
214	1	459	2.8765	0.7904
219	1	452	2.9334	0.7769
220	1	532	3.0225	0.8149
229	1	524	4.1164	1.0469
230	1	590	3.044	0.6924
235	1	469	2.568	0.7059
236	1	666	3.0633	0.7499
241	1	512		0.6433
242	1	460	2.382	0.5508
247	1	520	2.6903	0.4718
248	1	523	3.0533	0.8587
251	1	455	2.9312	0.7286
252	1	434	2.971	0.8472
255	1	637	2.9049	0.7693
256	1	634	3.0533	0.7458
203	2	517	3.0704	0.8368
204	2	603	2.6812	0.5721
209	2	539		0.6018
210	2	634	2.6406	0.4771
215	2	500	3.1293	0.6926
216	2	446	3.5366	0.7427
221	2	590	2.8483	0.4505
222	2	504	3.6601	0.6425
225	2	463		0.4368
226	2	541	3.7189	0.8316
233	2	556	3.5839	1.113
234	2	644	3.1553	0.7831
239	2	570	3.5333	0.8114
240	2	631	3.2158	0.7999
245	2	570	2.8698	0.7184
246	2	455	2.5652	0.5488
253	2	584	3.0962	0.7743
254	2	535	3.0059	0.6285
205	3	473	3.1597	0.7898
206	3	514	3.2606	0.678
211	3	462	2.96	0.6423
212	3	509	2.667	0.6832
217	3	581	2.8087	0.4466
218	3	601	3.4147	0.919
223	3	523	3.0339	0.7499
224	3	588		0.6176
227	3	518	3.2975	0.7978
228	3	556	2.6418	0.3914
231	3	560	3.6975	0.6551
232	3	558	2.9466	0.9051
237	3	555	3.2365	0.7362
238	3	646	3.053	0.8179
243	3	454	2.5261	0.6239
244	3	459	2.9249	0.8463
249	3	500	3.3322	0.7262
250	3	459	3.7947	0.8542
